# Supplementary material for: GC bias affects genomic and metagenomic reconstructions, underrepresenting GC-poor organisms
Source: PubMed Central journal article supplement (PMC7016772; doi:10.1093/gigascience/giaa008), 2020-02-13

## Substantial GC-bias impacts genomic and metagenomic reconstructions, significantly underrepresenting GC-poor organisms --Manuscript Draft--

|                                                      |                                                                                                                                                                                                                                                                                                                                                                                                                                                                                                                                                                                                                                                                                                                                                                                                                                                                                                                                                                                                                                                                                                                                                                                                                                                                                                                                                                                                                                                                                                                                                                                                                                                                                                                                                                                                                                                                                                                                               |                                  |
|------------------------------------------------------|-----------------------------------------------------------------------------------------------------------------------------------------------------------------------------------------------------------------------------------------------------------------------------------------------------------------------------------------------------------------------------------------------------------------------------------------------------------------------------------------------------------------------------------------------------------------------------------------------------------------------------------------------------------------------------------------------------------------------------------------------------------------------------------------------------------------------------------------------------------------------------------------------------------------------------------------------------------------------------------------------------------------------------------------------------------------------------------------------------------------------------------------------------------------------------------------------------------------------------------------------------------------------------------------------------------------------------------------------------------------------------------------------------------------------------------------------------------------------------------------------------------------------------------------------------------------------------------------------------------------------------------------------------------------------------------------------------------------------------------------------------------------------------------------------------------------------------------------------------------------------------------------------------------------------------------------------|----------------------------------|
| <b>Manuscript Number:</b>                            | GIGA-D-19-00255R1                                                                                                                                                                                                                                                                                                                                                                                                                                                                                                                                                                                                                                                                                                                                                                                                                                                                                                                                                                                                                                                                                                                                                                                                                                                                                                                                                                                                                                                                                                                                                                                                                                                                                                                                                                                                                                                                                                                             |                                  |
| <b>Full Title:</b>                                   | Substantial GC-bias impacts genomic and metagenomic reconstructions, significantly underrepresenting GC-poor organisms                                                                                                                                                                                                                                                                                                                                                                                                                                                                                                                                                                                                                                                                                                                                                                                                                                                                                                                                                                                                                                                                                                                                                                                                                                                                                                                                                                                                                                                                                                                                                                                                                                                                                                                                                                                                                        |                                  |
| <b>Article Type:</b>                                 | Research                                                                                                                                                                                                                                                                                                                                                                                                                                                                                                                                                                                                                                                                                                                                                                                                                                                                                                                                                                                                                                                                                                                                                                                                                                                                                                                                                                                                                                                                                                                                                                                                                                                                                                                                                                                                                                                                                                                                      |                                  |
| <b>Funding Information:</b>                          | Villum Fonden                                                                                                                                                                                                                                                                                                                                                                                                                                                                                                                                                                                                                                                                                                                                                                                                                                                                                                                                                                                                                                                                                                                                                                                                                                                                                                                                                                                                                                                                                                                                                                                                                                                                                                                                                                                                                                                                                                                                 | Prof. Lars Hestbjerg Hansen      |
|                                                      | Aarhus Universitets Forskningsfond                                                                                                                                                                                                                                                                                                                                                                                                                                                                                                                                                                                                                                                                                                                                                                                                                                                                                                                                                                                                                                                                                                                                                                                                                                                                                                                                                                                                                                                                                                                                                                                                                                                                                                                                                                                                                                                                                                            | Dr. Tue Kjærgaard Nielsen        |
|                                                      | Højteknologifonden<br>(080-2012-3-Food genomics)                                                                                                                                                                                                                                                                                                                                                                                                                                                                                                                                                                                                                                                                                                                                                                                                                                                                                                                                                                                                                                                                                                                                                                                                                                                                                                                                                                                                                                                                                                                                                                                                                                                                                                                                                                                                                                                                                              | Prof. Thomas Marcus Pius Gilbert |
| <b>Abstract:</b>                                     | <p>Background</p> <p>Metagenomic sequencing is a well-established tool in the modern biosciences. While it promises unparalleled insights into the genetic content of the biological samples studied, conclusions drawn are at risk from biases inherent to the DNA sequencing methods, including inaccurate abundance estimates as a function of genomic GC contents. Results</p> <p>We explored such GC-biases across many commonly used platforms in experiments sequencing multiple genomes (with mean GC contents ranging from 28.9% to 62.4%) and metagenomes. GC-bias profiles varied among different library preparation protocols and sequencing platforms. We found that our workflows employing MiSeq and NextSeq suffered major GC-biases, with problems becoming increasingly severe outside the 45-65% GC range, leading to a falsely low coverage in GC-rich and especially GC-poor sequences, where genomic windows with 30% GC content had over 10-fold less coverage than windows close to 50% GC content. We also showed that GC content correlates very tightly with coverage biases. The PacBio and HiSeq platforms also evidenced similar profiles of GC-biases to each other which were distinct from those seen in the MiSeq and NextSeq workflows. The Oxford Nanopore workflow was not afflicted with GC-bias. Conclusions</p> <p>These findings indicate potential sources of difficulty, arising from GC-biases, in genome sequencing which could be pre-emptively addressed with methodological optimisations provided that the GC-biases inherent to the relevant workflow are understood. Furthermore, it is recommended that a more critical approach is taken in quantitative abundance estimates in metagenomic studies. In the future, metagenomic studies should take steps to account for the effects of GC-bias before drawing conclusions, or they should employ a demonstrably unbiased workflow.</p> |                                  |
| <b>Corresponding Author:</b>                         | Patrick Denis Browne, Ph.D<br>University of Copenhagen<br>Copenhagen, DENMARK                                                                                                                                                                                                                                                                                                                                                                                                                                                                                                                                                                                                                                                                                                                                                                                                                                                                                                                                                                                                                                                                                                                                                                                                                                                                                                                                                                                                                                                                                                                                                                                                                                                                                                                                                                                                                                                                 |                                  |
| <b>Corresponding Author Secondary Information:</b>   |                                                                                                                                                                                                                                                                                                                                                                                                                                                                                                                                                                                                                                                                                                                                                                                                                                                                                                                                                                                                                                                                                                                                                                                                                                                                                                                                                                                                                                                                                                                                                                                                                                                                                                                                                                                                                                                                                                                                               |                                  |
| <b>Corresponding Author's Institution:</b>           | University of Copenhagen                                                                                                                                                                                                                                                                                                                                                                                                                                                                                                                                                                                                                                                                                                                                                                                                                                                                                                                                                                                                                                                                                                                                                                                                                                                                                                                                                                                                                                                                                                                                                                                                                                                                                                                                                                                                                                                                                                                      |                                  |
| <b>Corresponding Author's Secondary Institution:</b> |                                                                                                                                                                                                                                                                                                                                                                                                                                                                                                                                                                                                                                                                                                                                                                                                                                                                                                                                                                                                                                                                                                                                                                                                                                                                                                                                                                                                                                                                                                                                                                                                                                                                                                                                                                                                                                                                                                                                               |                                  |
| <b>First Author:</b>                                 | Patrick Denis Browne                                                                                                                                                                                                                                                                                                                                                                                                                                                                                                                                                                                                                                                                                                                                                                                                                                                                                                                                                                                                                                                                                                                                                                                                                                                                                                                                                                                                                                                                                                                                                                                                                                                                                                                                                                                                                                                                                                                          |                                  |
| <b>First Author Secondary Information:</b>           |                                                                                                                                                                                                                                                                                                                                                                                                                                                                                                                                                                                                                                                                                                                                                                                                                                                                                                                                                                                                                                                                                                                                                                                                                                                                                                                                                                                                                                                                                                                                                                                                                                                                                                                                                                                                                                                                                                                                               |                                  |
| <b>Order of Authors:</b>                             | Patrick Denis Browne                                                                                                                                                                                                                                                                                                                                                                                                                                                                                                                                                                                                                                                                                                                                                                                                                                                                                                                                                                                                                                                                                                                                                                                                                                                                                                                                                                                                                                                                                                                                                                                                                                                                                                                                                                                                                                                                                                                          |                                  |
|                                                      | Tue Kjærgaard Nielsen                                                                                                                                                                                                                                                                                                                                                                                                                                                                                                                                                                                                                                                                                                                                                                                                                                                                                                                                                                                                                                                                                                                                                                                                                                                                                                                                                                                                                                                                                                                                                                                                                                                                                                                                                                                                                                                                                                                         |                                  |
|                                                      |                                                                                                                                                                                                                                                                                                                                                                                                                                                                                                                                                                                                                                                                                                                                                                                                                                                                                                                                                                                                                                                                                                                                                                                                                                                                                                                                                                                                                                                                                                                                                                                                                                                                                                                                                                                                                                                                                                                                               |                                  |

|                                                |                                                                                                                                                                                                                                                                                                                                                                                                                                                                                                                                                                                                                                                                                                                                                                                                                                                                                                                                                                                                                                                                                                                                                                                                                                                                                                                                                                                                                                                                                                                                                                                                                                                                                                                                                                                                                                                                                                                                                                                                                                                                                                                                                                                                                                                                                                                                                                                                                                                                                                                                                                                                                                                                                                                                                                                                                                                                                                                                                                                                                                                                                                                                                                                                                                                                                                                                                                                                                                                                                                                                                                                                                       |
|------------------------------------------------|-----------------------------------------------------------------------------------------------------------------------------------------------------------------------------------------------------------------------------------------------------------------------------------------------------------------------------------------------------------------------------------------------------------------------------------------------------------------------------------------------------------------------------------------------------------------------------------------------------------------------------------------------------------------------------------------------------------------------------------------------------------------------------------------------------------------------------------------------------------------------------------------------------------------------------------------------------------------------------------------------------------------------------------------------------------------------------------------------------------------------------------------------------------------------------------------------------------------------------------------------------------------------------------------------------------------------------------------------------------------------------------------------------------------------------------------------------------------------------------------------------------------------------------------------------------------------------------------------------------------------------------------------------------------------------------------------------------------------------------------------------------------------------------------------------------------------------------------------------------------------------------------------------------------------------------------------------------------------------------------------------------------------------------------------------------------------------------------------------------------------------------------------------------------------------------------------------------------------------------------------------------------------------------------------------------------------------------------------------------------------------------------------------------------------------------------------------------------------------------------------------------------------------------------------------------------------------------------------------------------------------------------------------------------------------------------------------------------------------------------------------------------------------------------------------------------------------------------------------------------------------------------------------------------------------------------------------------------------------------------------------------------------------------------------------------------------------------------------------------------------------------------------------------------------------------------------------------------------------------------------------------------------------------------------------------------------------------------------------------------------------------------------------------------------------------------------------------------------------------------------------------------------------------------------------------------------------------------------------------------------|
|                                                | Witold Kot                                                                                                                                                                                                                                                                                                                                                                                                                                                                                                                                                                                                                                                                                                                                                                                                                                                                                                                                                                                                                                                                                                                                                                                                                                                                                                                                                                                                                                                                                                                                                                                                                                                                                                                                                                                                                                                                                                                                                                                                                                                                                                                                                                                                                                                                                                                                                                                                                                                                                                                                                                                                                                                                                                                                                                                                                                                                                                                                                                                                                                                                                                                                                                                                                                                                                                                                                                                                                                                                                                                                                                                                            |
|                                                | Anni Aggerholm                                                                                                                                                                                                                                                                                                                                                                                                                                                                                                                                                                                                                                                                                                                                                                                                                                                                                                                                                                                                                                                                                                                                                                                                                                                                                                                                                                                                                                                                                                                                                                                                                                                                                                                                                                                                                                                                                                                                                                                                                                                                                                                                                                                                                                                                                                                                                                                                                                                                                                                                                                                                                                                                                                                                                                                                                                                                                                                                                                                                                                                                                                                                                                                                                                                                                                                                                                                                                                                                                                                                                                                                        |
|                                                | Thomas Marcus Pius Gilbert                                                                                                                                                                                                                                                                                                                                                                                                                                                                                                                                                                                                                                                                                                                                                                                                                                                                                                                                                                                                                                                                                                                                                                                                                                                                                                                                                                                                                                                                                                                                                                                                                                                                                                                                                                                                                                                                                                                                                                                                                                                                                                                                                                                                                                                                                                                                                                                                                                                                                                                                                                                                                                                                                                                                                                                                                                                                                                                                                                                                                                                                                                                                                                                                                                                                                                                                                                                                                                                                                                                                                                                            |
|                                                | Lara Puetz                                                                                                                                                                                                                                                                                                                                                                                                                                                                                                                                                                                                                                                                                                                                                                                                                                                                                                                                                                                                                                                                                                                                                                                                                                                                                                                                                                                                                                                                                                                                                                                                                                                                                                                                                                                                                                                                                                                                                                                                                                                                                                                                                                                                                                                                                                                                                                                                                                                                                                                                                                                                                                                                                                                                                                                                                                                                                                                                                                                                                                                                                                                                                                                                                                                                                                                                                                                                                                                                                                                                                                                                            |
|                                                | Morten Rasmussen                                                                                                                                                                                                                                                                                                                                                                                                                                                                                                                                                                                                                                                                                                                                                                                                                                                                                                                                                                                                                                                                                                                                                                                                                                                                                                                                                                                                                                                                                                                                                                                                                                                                                                                                                                                                                                                                                                                                                                                                                                                                                                                                                                                                                                                                                                                                                                                                                                                                                                                                                                                                                                                                                                                                                                                                                                                                                                                                                                                                                                                                                                                                                                                                                                                                                                                                                                                                                                                                                                                                                                                                      |
|                                                | Athanasios Zervas                                                                                                                                                                                                                                                                                                                                                                                                                                                                                                                                                                                                                                                                                                                                                                                                                                                                                                                                                                                                                                                                                                                                                                                                                                                                                                                                                                                                                                                                                                                                                                                                                                                                                                                                                                                                                                                                                                                                                                                                                                                                                                                                                                                                                                                                                                                                                                                                                                                                                                                                                                                                                                                                                                                                                                                                                                                                                                                                                                                                                                                                                                                                                                                                                                                                                                                                                                                                                                                                                                                                                                                                     |
|                                                | Lars Hestbjerg Hansen                                                                                                                                                                                                                                                                                                                                                                                                                                                                                                                                                                                                                                                                                                                                                                                                                                                                                                                                                                                                                                                                                                                                                                                                                                                                                                                                                                                                                                                                                                                                                                                                                                                                                                                                                                                                                                                                                                                                                                                                                                                                                                                                                                                                                                                                                                                                                                                                                                                                                                                                                                                                                                                                                                                                                                                                                                                                                                                                                                                                                                                                                                                                                                                                                                                                                                                                                                                                                                                                                                                                                                                                 |
| <b>Order of Authors Secondary Information:</b> |                                                                                                                                                                                                                                                                                                                                                                                                                                                                                                                                                                                                                                                                                                                                                                                                                                                                                                                                                                                                                                                                                                                                                                                                                                                                                                                                                                                                                                                                                                                                                                                                                                                                                                                                                                                                                                                                                                                                                                                                                                                                                                                                                                                                                                                                                                                                                                                                                                                                                                                                                                                                                                                                                                                                                                                                                                                                                                                                                                                                                                                                                                                                                                                                                                                                                                                                                                                                                                                                                                                                                                                                                       |
| <b>Response to Reviewers:</b>                  | <p>Reviewer #1</p> <p>Browne et al present their results when studying GC-biases across several NGS platforms and for several microbial genomes.</p> <p>While this is an important topic with applications/consequences in data analysis (e.g., assembly), several unclear, convoluted and confusing statements were found or many necessary information for validation/reproducibility were missing (cf. examples below):</p> <p>Major issues:</p> <p>- Methods:</p> <p>- - "Coverage was assessed in 500 bp wide sliding windows, and the coverage was normalized by dividing by the average coverage of the 49% GC-genomic windows as all bacteria sequenced in this work have sufficient numbers of genomic windows with 49% GC content". Please provide references justifying this normalization method.</p> <p>Response:</p> <p>A reference to using a windowed approach similar to our approach is now inserted into the relevant methods section (lines 604 to 605). Also, further analyses justifying the choice of 500 nt as the window size was inserted into the same methods section (lines 613 to 619) and illustrated in a new supplementary figure (Additional file 14).</p> <p>- - Why does the relative coverage decreases for high G+C content in half of the bacteria showed in Fig 2? please provide some explanations/insights.</p> <p>Response:</p> <p>We regret this oversight and agree that it is important to discuss this matter. The focus of this work was assessing the occurrence of GC bias in NGS datasets and our experiments were not designed to investigate the mechanisms responsible for introducing bias. Nonetheless, further analyses revealed that the likely cause for this is that the Illumina MiSeq sequencer yielded lower quality scores for high GC content reads. This resulted in quality filtering disproportionately filtering out high GC content reads. Thus we concluded that the source of the bias is largely due to an inability of the sequencer to call bases with high confidence (i.e. good Phred scores) in clusters with high GC content. This analysis and the results and conclusion were all added to the manuscript (lines 251 to 255, 273 to 276, 365 to 386, Additional files 6 + 7).</p> <p>- - "The relatively small error-bars (standard deviation) seen in Fig. 2 indicate that relative coverage and local GC-content are tightly correlated." =&gt; I do not see how this statement is true. A small error-bars only indicates that the measurement method is itself precise, please fully explain what/why this correlation.</p> <p>Response:</p> <p>We are sorry for the need to clarify. Because the error bars represent the variability in the relative coverage of all the different 500 nt windows for each respective 1%-wide GC-bin, rather than a repeated measure of the same genomic region in different replicates, we disagree with the reviewer on this point. We have changed the text in order to make it clearer that the error bars represent the standard deviation of measurements of coverage among all 500 nt windows at each 1%-wide GC-bin (lines 242 to 244).</p> <p>- - "Metagenome datasets were retrieved from several sources. Datasets ERR526087 (2 x 100bp) and SRR5035895 (2 x 300 bp) were retrieved with the fastq-dump utility of the SRA toolkit V.2.9.0. The longest reads in these datasets were split in half and treated as read pairs, and shorter reads were discarded since the read pairs were concatenated without annotation of the concatenation point. " -&gt; These datasets are</p> |

Illumina Paired-end reads, hence why the need to split them and treat them as paired if they are paired already ? Also, all reads have same length in each dataset, hence how authors selected those that are the longest and those that are the shortest, if they all have same length...

Response:

In the SRA, reads may be stored with the pairs interleaved or concatenated. In the above-mentioned SRA datasets, the read pairs were concatenated. When the reads are concatenated, there is no spacer nor filler sequence separating the reads. When reads are truncated in any way (e.g. when quality trimmed reads are uploaded to the SRA instead of raw reads) it is impossible to tell where the concatenated read should be split in order to recover the original R1 and R2 read pairs. Only in the case where neither of the reads in a pair were trimmed before concatenation is it possible to retrieve the original read pairs by splitting the paired read in half. For this reason, it is correct to keep only the full length reads and to then split them in half to retrieve the original pairs. This problem is described by Robert Edgar in his usearch v11 documentation for the fastq\_sra\_splitpairs command:

[https://www.drive5.com/usearch/manual/cmd\\_fastq\\_sra\\_splitpairs.html](https://www.drive5.com/usearch/manual/cmd_fastq_sra_splitpairs.html)

The manuscript was updated in order to make this problem clearer and to make it absolutely clear that single reads were not simply being split in two and treated as read pairs (lines 626 to 630).

- - Regarding the DNA extraction of the Fusabacterium sp. C1 isolates, how was it performed exactly (manual ? automated? kits used?... ) ?

Response:

It is clearly stated in the relevant materials and methods section (Genome sequencing, assembly and annotation) that all DNA extractions were performed with the UltraClean Microbial DNA kit (MoBio) except for the DNA extracts for ddPCR and Nanopore sequencing, which were performed using the Genomic Mini AX Bacteria kit (A&A Biotechnology). Following the reviewer's comment, the word "experiment" was added after "ddPCR" in the relevant section of the text (line 555) as it could be misconstrued that the term "ddPCR library" was implied, which would be wrong and thus lead to confusion about DNA extraction methodologies.

- Results:

- - The poor quality of the figures provided, especially fig. 1, 2, is problematic and it does not permit the reader to quickly confirm/evaluate the explanations/claims that are made from them.

Response:

It is not clear in what way the reviewer means that the figures are of poor quality. Perhaps it is that they were in low-resolution in the PDF provided for review and the reviewer had a problem with the link in the pdf to access the high-resolution versions. We have now verified that these figures are of sufficient quality to be viewed clearly in the resolution intended for publication and we will accommodate the requests of the journal's copy editors in these matters should the need arise.

- - Authors claimed that their data were deposited under the Bioproject "PRJNA503577", yet the search engine in SRA/NBCI returns no result. Where is the data of this project?

Response:

This is indeed the correct BioProject number. The data is already uploaded to SRA, but will not be made publicly available until the date of publication. During the submission of this manuscript I didn't think to obtain a reviewer link to this data. I hereby apologize to the reviewers and editor for this oversight. The data under this BioProject number should be available for review at the following URL:

<https://dataview.ncbi.nlm.nih.gov/object/PRJNA503577?reviewer=bajmo4nn0pv6gg3m0n28v9kbjt>

- Other:

Authors focused their analysis almost all about the GC-content, yet the title refers to the AT-content. Authors should clarify/revise the title to reflect the content/results of their study.

Response:

The manuscript, including the title, was revised to address this issue and to make the terminology consistent. Terms referring to high AT or low AT or AT bias were replaced by suitable terms referring to GC.

Minor issues:

- Additional Table 1, I recommend authors to indicate the N50 for the pacbio and nanopore datasets, in addition to the minimum/median/maximum already provided.

Response:

It's a good suggestion. N50 values for pacbio and nanopore datasets have now been added to Additional Table 1.

- I believe the reader would be grateful if the authors can revise the many long paragraphs present in the manuscript into more concise ones.

Response:

Many changes are now made throughout this revised version to make it more readable.

Other General comments:

- Several grammatical English typo/mistakes were found (e.g., "well-establish" -> "well-established",

Response:

The correction was made exactly as suggested

"genomic and metagenomics data" -> "genomic and metagenomic data",

Response:

The correction was made exactly as suggested

"every more" -> "even more",

Response:

The intended meaning, obfuscated by the typo, was "ever more". This has now been corrected.

"to increase understanding" -> "to increase the/our understanding" (?), etc.)

Response:

"to increase understanding" was changed to "to improve the general understanding"

and, often sentences are convoluted (for example, "PCR product sequencing depth investigation", this is not a correct English), please have the manuscript reviewed by a third-person skilled in English.

Response:

This is now changed to "Long range PCR product sequencing". The manuscript has been reviewed by two native English speakers.

Reviewer #2

In this paper, Browne et al., attempt to systematically measure performances across various sequencing platforms using samples containing different level of GC content. While this a known issue (particularly for Illumina technologies) this is a useful analysis to quantify the potential impact on the accuracy of genomic and metagenomic reconstructions. Importantly, they have made all sequence data available at SRA and their analysis tools available via github allowing other labs to perform similar analyses, an important point given the suspected lab-specific biases. Overall, I believe the body of work is an important analysis highlighting significant technological biases whose impact is underappreciated. The following issues need to be addressed.

Major:

1)Did you try any other sliding window sizes and if so what did you observe? Why did you choose 500bp? The choice of window size may be impacted by the 'proximity to a region if balanced GC content' mentioned in line 353 in the discussion.

Response:

We did consider this point, but failed to discuss it in the text. A new supplementary file was added illustrating the same analyses using various different window sizes ranging from 50bp to 5000 bp. These are presented in a new supplementary figure (Additional

file 14) and show that the conclusions are not affected by the choice of window sizes, although small window sizes showed more variability in the normalized coverages (error bars), while larger windows led to a reduction in the range of GC contents being represented in the data. Some details about these observations were also added to the relevant methods section (lines 613 to 619).

2) Did the authors examine reads with very high or low GC content for differences in base qualities relative to balanced GC content reads? Given QC software was utilized to trim/filter reads prior to alignment, it should be confirmed that high/low GC content reads were not being removed or trimmed extensively during QC prior to alignment.

Response:

The qualities of sequencing reads were investigated with respect to GC-content. Furthermore, the effects of quality filtering were investigated to see if quality filtering was impacting coverage in a manner related to GC content. It was concluded that the lowering of relative coverage above c.a. 65% GC content in certain MiSeq datasets is due to reads with high-GC content having lower quality and being disproportionately affected by quality filtering. However, we still maintain that the inability of a sequencer to produce base calls with a high-degree of certainty in high-GC regions is a subset of what we should refer to as GC bias. These effects were stated in the relevant analyses sections and discussed in the discussion section and represented with two further supplementary figures (lines 252 to 256, 273 to 276, 365 to 386, Additional files 6 + 7). We thank the reviewer for making this interesting point because addressing it has added considerable value to this manuscript.

3) While the genomic analysis of the variable GC content in bacterial genomes illustrates a very clear and systematic contribution from GC content, the trend in the metagenomic analysis is less clear with five distinct profiles reported across the five data sets due to other cofounders. The authors make claims regarding the possibility of correcting for GC content in metagenomics (Line 403) however I am not sure this claim is supported by the analysis.

Response:

We perhaps stated this too generally. What we mean is that the GC bias within a metagenome dataset needs to be assessed following a metagenome assembly of that dataset in order to obtain parameters that could be used to correct abundance estimates. However, we did not explore the correction of GC bias in this work. We have now restated the relevant point to make it clear that we do not mean that the error profiles in our datasets here could somehow be used to correct GC biases in metagenome datasets in general (lines 448 to 452).

4) To verify the coverage spikes observed in Fig 1, the authors perform ddPCR and sequence two regions contain 30.2% and 45.5% GC content using an equimolar mixture. Overall, the 45.5% GC region mapped ~4X, ~11X, and 5X more reads than the 30.2% region. While the trend is clear, I would expect these numbers to be much closer however one replicate is overrepresented 3 times more than the other two replicates. Did you investigate if there is something substantially different about this replicate?

Response:

The authors have previously noted and discussed this difference. A lot of ideas have been put forward but none can be supported by our data. Therefore, we are up-front about the fact that there is a big variation in this experiment, but it can only be regarded as experimental (technical) variability. As the trends in coverage are similar among all replicates we assert that the data still supports the notion that the 45.5% GC regions receive much more coverage than the 30.2% GC region in our MiSeq workflow. We have now added a note to the relevant section of additional file 2 (the final paragraph of additional file 2) in order to discuss this point.

5) In the discussion (line 426), the authors point out their analysis is in some aspects, contradictory to several published works and indicate this is likely due to differences between labs which employ different library production protocols and HTS workflows. This is a critical finding of the analysis and needs to be stated more clearly throughout.

Response:

This is a good point as drawing attention to the major methodological differences between the different sequencing work flows is a good service to the reader who can now more easily ascertain which work flow led to which GC bias profile. This was

|                                                                                                                                                                                                                                                                                                        |                                                                                                                                                                                                                                                                                                                                                                                                                                                                                                                                                                                                                                                                                                                                                                                                                                                                                                                                                                                                                                                                                                                                                                                                                                                                                                                                                                                                                                                                                                                                                                                                                                                                                                                                                                                                                                                                                                                                                                                                                                                                                                                                                                                                                                                                                                                                                                                                                                                                                                                                                                                                                                          |
|--------------------------------------------------------------------------------------------------------------------------------------------------------------------------------------------------------------------------------------------------------------------------------------------------------|------------------------------------------------------------------------------------------------------------------------------------------------------------------------------------------------------------------------------------------------------------------------------------------------------------------------------------------------------------------------------------------------------------------------------------------------------------------------------------------------------------------------------------------------------------------------------------------------------------------------------------------------------------------------------------------------------------------------------------------------------------------------------------------------------------------------------------------------------------------------------------------------------------------------------------------------------------------------------------------------------------------------------------------------------------------------------------------------------------------------------------------------------------------------------------------------------------------------------------------------------------------------------------------------------------------------------------------------------------------------------------------------------------------------------------------------------------------------------------------------------------------------------------------------------------------------------------------------------------------------------------------------------------------------------------------------------------------------------------------------------------------------------------------------------------------------------------------------------------------------------------------------------------------------------------------------------------------------------------------------------------------------------------------------------------------------------------------------------------------------------------------------------------------------------------------------------------------------------------------------------------------------------------------------------------------------------------------------------------------------------------------------------------------------------------------------------------------------------------------------------------------------------------------------------------------------------------------------------------------------------------------|
|                                                                                                                                                                                                                                                                                                        | <p>addressed by adding a statement to the abstract (lines 58 to 59) that one of the key results was that library preparation and sequencing protocols affect the profile of GC bias. Furthermore, attention was drawn to the broad (and important) similarities and differences between methods producing data sets analysed in this work in the Data Description section (lines 158 to 164), and brief statements regarding the library production protocols were made while presenting the results (lines 230 to 231, 259 to 260, 277, 290 to 291 and 292).</p> <p>6)This work looks at several different technologies and illustrates platform specific biases in their handling of different levels of GC content. With projects increasingly incorporating multiple sequencing technologies, it would be useful to discuss ideas for how best to combine the different platforms to minimize the impact of such biases.<br/>Response:<br/>This idea was mentioned in the discussion. However, an addition was made to make the meaning more obvious (lines 410 to 416).</p> <p>Minor:</p> <p>1)Central to many reported differences are issues in library production protocols. Given the apparent clustering of patterns in GC bias for different sequencing technologies, the authors need to more clearly define the protocols particularly with regard to similarities and differences.<br/>Response:<br/>The differences (and similarities) between the library production protocols are distillable from the relevant materials and methods section. However, we agree that this requires significant effort on a reader's part to follow how the major differences between library production protocols may be related to the GC-bias profiles presented in this work. In the Analyses section, there are now mentions about the major steps involved in each workflow which should make it easier for a reader to assess which protocol is associated with a particular GC-bias profile (lines 230 to 231, 259 to 260, 277, 290 to 291 and 292).</p> <p>2)Throughout the manuscript, the authors jump from GC to AT content depending on context. It would be easier to follow if they consistently reported it with GC content listed first throughout.<br/>Response:<br/>The manuscript was revised to make terminology consistent. Terms referring to high AT or low AT or AT bias were replaced by terms referring to the relevant GC content.</p> <p>3)Abstract typo: Metagenomic sequencing is a well-establish(ed) tool in the modern biosciences<br/>Response:<br/>The correction was made exactly as suggested</p> |
| <b>Additional Information:</b>                                                                                                                                                                                                                                                                         |                                                                                                                                                                                                                                                                                                                                                                                                                                                                                                                                                                                                                                                                                                                                                                                                                                                                                                                                                                                                                                                                                                                                                                                                                                                                                                                                                                                                                                                                                                                                                                                                                                                                                                                                                                                                                                                                                                                                                                                                                                                                                                                                                                                                                                                                                                                                                                                                                                                                                                                                                                                                                                          |
| <b>Question</b>                                                                                                                                                                                                                                                                                        | <b>Response</b>                                                                                                                                                                                                                                                                                                                                                                                                                                                                                                                                                                                                                                                                                                                                                                                                                                                                                                                                                                                                                                                                                                                                                                                                                                                                                                                                                                                                                                                                                                                                                                                                                                                                                                                                                                                                                                                                                                                                                                                                                                                                                                                                                                                                                                                                                                                                                                                                                                                                                                                                                                                                                          |
| Are you submitting this manuscript to a special series or article collection?                                                                                                                                                                                                                          | No                                                                                                                                                                                                                                                                                                                                                                                                                                                                                                                                                                                                                                                                                                                                                                                                                                                                                                                                                                                                                                                                                                                                                                                                                                                                                                                                                                                                                                                                                                                                                                                                                                                                                                                                                                                                                                                                                                                                                                                                                                                                                                                                                                                                                                                                                                                                                                                                                                                                                                                                                                                                                                       |
| <b>Experimental design and statistics</b>                                                                                                                                                                                                                                                              | Yes                                                                                                                                                                                                                                                                                                                                                                                                                                                                                                                                                                                                                                                                                                                                                                                                                                                                                                                                                                                                                                                                                                                                                                                                                                                                                                                                                                                                                                                                                                                                                                                                                                                                                                                                                                                                                                                                                                                                                                                                                                                                                                                                                                                                                                                                                                                                                                                                                                                                                                                                                                                                                                      |
| <p>Full details of the experimental design and statistical methods used should be given in the Methods section, as detailed in our <a href="#">Minimum Standards Reporting Checklist</a>. Information essential to interpreting the data presented should be made available in the figure legends.</p> |                                                                                                                                                                                                                                                                                                                                                                                                                                                                                                                                                                                                                                                                                                                                                                                                                                                                                                                                                                                                                                                                                                                                                                                                                                                                                                                                                                                                                                                                                                                                                                                                                                                                                                                                                                                                                                                                                                                                                                                                                                                                                                                                                                                                                                                                                                                                                                                                                                                                                                                                                                                                                                          |

|                                                                                                                                                                                                                                                                                                                                                                                                                                                                                                                                                         |            |
|---------------------------------------------------------------------------------------------------------------------------------------------------------------------------------------------------------------------------------------------------------------------------------------------------------------------------------------------------------------------------------------------------------------------------------------------------------------------------------------------------------------------------------------------------------|------------|
| <p>Have you included all the information requested in your manuscript?</p>                                                                                                                                                                                                                                                                                                                                                                                                                                                                              |            |
| <p><b>Resources</b></p> <p>A description of all resources used, including antibodies, cell lines, animals and software tools, with enough information to allow them to be uniquely identified, should be included in the Methods section. Authors are strongly encouraged to cite <a href="#">Research Resource Identifiers</a> (RRIDs) for antibodies, model organisms and tools, where possible.</p> <p>Have you included the information requested as detailed in our <a href="#">Minimum Standards Reporting Checklist</a>?</p>                     | <p>Yes</p> |
| <p><b>Availability of data and materials</b></p> <p>All datasets and code on which the conclusions of the paper rely must be either included in your submission or deposited in <a href="#">publicly available repositories</a> (where available and ethically appropriate), referencing such data using a unique identifier in the references and in the “Availability of Data and Materials” section of your manuscript.</p> <p>Have you have met the above requirement as detailed in our <a href="#">Minimum Standards Reporting Checklist</a>?</p> | <p>Yes</p> |



1 **Substantial GC-bias impacts genomic and metagenomic**  
2 **reconstructions, significantly underrepresenting GC-poor**  
3 **organisms**

4 Patrick Denis Browne\*

5 Department of Plant and Environmental Sciences, University of Copenhagen, Copenhagen, Denmark

6 Department of Environmental Sciences, Aarhus University, Roskilde, Denmark

7 pdbr@plen.ku.dk

8

9 Tue Kjærsgaard Nielsen

10 Department of Plant and Environmental Sciences, University of Copenhagen, Copenhagen, Denmark

11 Department of Environmental Sciences, Aarhus University, Roskilde, Denmark

12 tkn@plen.ku.dk

13

14 Witold Kot

15 Department of Plant and Environmental Sciences, University of Copenhagen, Copenhagen, Denmark

16 Department of Environmental Sciences, Aarhus University, Roskilde, Denmark

17 wk@plen.ku.dk

18

19 Anni Aggerholm

20 Department of Hematology, Aarhus University Hospital, Aarhus, Denmark

21 anniagge@rm.dk

22

23 M. Thomas P. Gilbert

24 The GLOBE Institute, Faculty of Health and Biomedical Sciences, University of Copenhagen,

25 Copenhagen, Denmark

26 mtpgilbert@gmail.com



27

28 Lara Puetz

29 The GLOBE Institute, Faculty of Health and Biomedical Sciences, University of Copenhagen,

30 Copenhagen, Denmark

31 lara.c.puetz@gmail.com

32

33 Morten Rasmussen

34 Department of Genetics, School of Medicine, Stanford University, Stanford, CA 94305

35 mortenras@gmail.com

36

37 Athanasios Zervas

38 Department of Environmental Science, Aarhus University, Roskilde 4000, Denmark

39 az@envs.au.dk

40

41 Lars Hestbjerg Hansen\*

42 Department of Plant and Environmental Sciences, University of Copenhagen, Copenhagen, Denmark

43 Department of Environmental Sciences, Aarhus University, Roskilde, Denmark

44 lhha@plen.ku.dk

45

46 \*Corresponding Authors

47

## 48 **Abstract**

### 49 **Background**

50 Metagenomic sequencing is a well-established tool in the modern biosciences. While it

51 promises unparalleled insights into the genetic content of the biological samples

52 studied, conclusions drawn are at risk from biases inherent to the DNA sequencing

53 methods, including inaccurate abundance estimates as a function of genomic GC  
54 contents.

## 55 **Results**

56 We explored such GC-biases across many commonly used platforms in experiments  
57 sequencing multiple genomes (with mean GC contents ranging from 28.9% to 62.4%)  
58 and metagenomes. GC-bias profiles varied among different library preparation protocols  
59 and sequencing platforms. We found that our workflows employing MiSeq and NextSeq  
60 suffered major GC-biases, with problems becoming increasingly severe outside the 45-  
61 65% GC range, leading to a falsely low coverage in GC-rich and especially GC-poor  
62 sequences, where genomic windows with 30% GC content had over 10-fold less  
63 coverage than windows close to 50% GC content. We also showed that GC content  
64 correlates very tightly with coverage biases. The PacBio and HiSeq platforms also  
65 evidenced similar profiles of GC-biases to each other which were distinct from those  
66 seen in the MiSeq and NextSeq workflows. The Oxford Nanopore workflow was not  
67 afflicted with GC-bias.

## 68 **Conclusions**

69 These findings indicate potential sources of difficulty, arising from GC-biases, in  
70 genome sequencing which could be pre-emptively addressed with methodological  
71 optimisations provided that the GC-biases inherent to the relevant workflow are  
72 understood. Furthermore, it is recommended that a more critical approach is taken in  
73 quantitative abundance estimates in metagenomic studies. In the future, metagenomic

74 studies should take steps to account for the effects of GC-bias before drawing  
75 conclusions, or they should employ a demonstrably unbiased workflow.

76

## 77 **Keywords**

78 GC-bias, high-throughput sequencing, metagenomics, Illumina, Oxford Nanopore,  
79 PacBio

80

## 81 **Background**

82 Recent advances in sequencing technologies have led to the emergence of a variety of  
83 low cost per base, high-throughput sequencing (HTS) platforms [1]. Different HTS  
84 platforms vary on a number of counts, including read lengths, read quantities, biases,  
85 fidelity, cost per base and turnover time. These variations in attributes weigh in  
86 differently depending on the use case of HTS (e.g. small and large genome sequencing,  
87 genome resequencing, single-cell genome sequencing, transcriptome profiling,  
88 metagenomics studies and variant analyses [1]) and the most suitable platform, or  
89 combination of complementary platforms, is chosen.

90 It is well established that there are several biases in HTS data including substitution  
91 errors, insertion-deletion errors and compositional based coverage biases. For example,  
92 Illumina's MiSeq platform features substitution errors approximately 100-fold more  
93 abundantly than insertion/deletion errors, and the substitution errors occur more  
94 frequently in the first 10 nt and towards the ends of the reads [2]. Furthermore, DNA

95 extraction efficiency varies greatly between microorganisms, and thereby DNA  
96 extraction introduces biases into amplicon (e.g. small subunit (SSU) rRNA) surveys and  
97 metagenomics surveys [3]. However, this work focuses on coverage biases related to  
98 GC content.

99 Coverage biases can be introduced into HTS datasets in a variety of ways. PCR is  
100 known to be a major contributor to biases in HTS datasets [3]. It is widely known that  
101 sequencing GC-rich DNA is challenging due to its inefficient amplification by PCR [4],  
102 while GC-poor DNA can also be problematic [5, 6]. Other sample handling procedures  
103 during library preparation also contribute to coverage biases, often in a GC content  
104 dependent manner [5-9]. These biases are such that GC-rich and GC-poor sequences  
105 usually suffer from under-coverage relative to GC-optimal sequences [5, 6, 10, 11]. For  
106 instance, heat treatment (50 °C) to melt agarose gel slices prior to size selection during  
107 sample preparation can result in an under-representation of GC-poor sequences, which  
108 can be mitigated by melting agarose at room temperature [12]. Many experimental  
109 recommendations have already been made to mitigate GC-biases. Chief amongst these  
110 are recommendations aimed at reducing GC-biases introduced by PCR, such as the  
111 use of PCR-free HTS library preparation procedures when possible, choosing a less  
112 biasing PCR polymerase mixture, the use of PCR additives such as betaine to improve  
113 coverage of GC-rich regions, or trimethylammonium chloride to improve coverage of  
114 GC-poor regions and the reduction of temperature ramp rates in thermocyclers [4-8, 12,  
115 13]. Owing to the various biasing effects of DNA processing steps, coverage evenness  
116 has been shown to vary between different HTS library preparation kits, oftentimes in a  
117 GC content related manner [5, 8]. When considering technical optimisations to mitigate

118 GC-bias during HTS, it is often the case that optimisations to mitigate under-coverage of  
119 high-GC regions can exacerbate the under-coverage of low-GC regions and vice versa  
120 [13]. Thus it could be feasible to optimise HTS library preparation for sequencing a  
121 single microbial genome with a (approximately) known average GC content. However,  
122 this does not account for local variations in GC content within a single genome which  
123 can systematically result in very poor coverage of some loci, possibly leading to gaps in  
124 an assembly.

125 The focus of this work is to develop a better understanding of GC-dependent coverage  
126 biases in DNA sequencing in some of the currently most widely used HTS platforms,  
127 particularly in relation to metagenome sequencing. This is important because  
128 metagenome sequencing is being applied in a growing number of studies. Unbiased  
129 coverage in metagenome sequencing data is important since read numbers (or  
130 coverage) are used as a proxy for relative species or gene abundances in  
131 metagenomics surveys [8]. In the context of pure isolate genome (re)sequencing,  
132 unbiased coverage can be advantageous for obtaining complete coverage with  
133 relatively modest sequencing effort and many assembly algorithms do not perform  
134 optimally in the case of non-uniform coverage [14]. While it may be possible to mitigate  
135 against GC-biases with technical optimisations for single isolate genome sequencing, it  
136 will almost universally be the case that there will be a large number of DNA molecules  
137 with a wide range of average GC contents in the context of metagenome surveys. For  
138 this reason, the use of knowledge regarding the GC-bias profile of the HTS workflow  
139 employed may help to account for the effects of GC-bias during data processing. While  
140 it is generally known that GC-biases occur in HTS, it is not generally known how these

141 biases occur in different HTS workflows. In this work, we examine the GC-biases in five  
142 metagenome datasets and in single genome sequencing datasets of fourteen different  
143 bacteria with varying average GC contents. The implications of these biases should  
144 impact how we interpret both genomic and metagenomic data and how we design  
145 sequencing workflows in the future.

146

## 147 **Data Description**

148 A total of twenty shotgun genome sequencing datasets were produced using DNA  
149 isolated from fourteen different bacteria with contrasting average GC contents in order  
150 to examine the GC-dependent coverage biases inherent to five different sequencing  
151 workflows (MiSeq, NextSeq, HiSeq, Oxford Nanopore, and PacBio). Full details of  
152 which organism was sequenced according to which workflow are available in  
153 **Additional file 1**. All of these datasets have been made available in SRA under the  
154 BioProject accession number PRJNA503577. Similarly, we used five different  
155 metagenome datasets to examine GC-dependent coverage biases inherent to their  
156 workflows (Table 1), where four of these were already publicly available and one was  
157 produced as a part of another project [15], and uploaded to the SRA, under  
158 PRJNA503577, with that project's leader's consent. The library preparation protocol is  
159 an important factor when considering GC-bias in sequencing data. Therefore attention  
160 is drawn to the fact that the MiSeq and NextSeq workflows (Additional file 1) and one of  
161 the metagenome datasets (SRR8570466) were produced using very similar protocols,  
162 in contrast to the long read libraries and the other Illumina datasets (HiSeq genome

163 sequencing and the remaining metagenome libraries). None of the Illumina datasets  
164 were derived from PCR-free libraries while the PacBio and Nanopore data were.  
165 We also produced digital droplet PCR (ddPCR) data using three different primer sets  
166 targeting subsections of two single copy genes and the 16S rRNA gene on the  
167 chromosome of *Fusobacterium sp. C1*. The amplicons had different GC contents and  
168 ddPCR was used to assess the copy number of the 16S rRNA gene per chromosome.  
169 Finally, we produced MiSeq reads from triplicate equimolar mixtures of two 5.3 kb PCR  
170 products amplified from *Fusobacterium sp. C1* in order to confirm the occurrence of GC-  
171 dependent coverage biases independently of the genomic background. These MiSeq  
172 reads were also uploaded to the SRA under PRJNA503577.

173

## 174 **Analyses**

### 175 ***Fusobacterium* sequencing exemplifies under-coverage of GC-poor** 176 **loci**

177 We chose *Fusobacterium sp. C1* for a wide range of experiments related to GC-bias to  
178 build a complete picture of how GC-biases manifest in the sequencing of a GC-poor  
179 bacterial genome. These experiments encompassed genome sequencing using five  
180 different workflows (MiSeq, NextSeq, HiSeq, PacBio and Nanopore), MiSeq sequencing  
181 of long-range (5.3 kb) PCR amplicons and ddPCR to validate the SSU rRNA copy  
182 number.



183 Assembly of the *Fusobacterium sp.* C1 sequencing data resulted in one complete  
184 circular chromosome, 2,032,704 bp in length, and two probable plasmids, 1,964 and  
185 2,272 bp in length. The probable plasmids were omitted from coverage analyses due to  
186 uncertain stoichiometric ratios with the chromosome (see Methods). Hereafter the term  
187 C1 assembly refers only to the approx. 2.0 Mb contig. The C1 assembly had a relatively  
188 low GC content at 28.9%. Unsupervised annotation indicated that there were 1856  
189 CDSs, 66 tRNA genes and 28 rRNA genes in 9 rRNA loci.

190 Coverage of the C1 assembly by all five sequencing workflows is illustrated in **Fig. 1**. In  
191 the MiSeq, NextSeq, HiSeq and PacBio workflows, it is apparent that there are  
192 numerous coverage spikes, especially in the vicinity of rRNA loci. These coverage  
193 spikes appear to be much sharper in the MiSeq and NextSeq datasets than in the  
194 HiSeq and the PacBio datasets, with the biggest coverage spikes in the MiSeq and  
195 NextSeq data co-occurring very closely with changes in GC content in rRNA loci. For  
196 the GC-biased workflows (MiSeq, NextSeq, HiSeq and PacBio), the coverage depths at  
197 the rRNA loci vary between 5.1- and 8.0-fold higher than background coverage depths  
198 (MiSeq – 8.0; NextSeq - 5.1; HiSeq - 6.2 PacBio – 8.0), while for the Nanopore dataset,  
199 this ratio was 1.0 (calculations are detailed in <https://github.com/padbr/gcbias>). In  
200 contrast to the other four workflows, the Nanopore dataset had comparatively even  
201 coverage apart from one broad coverage spike near the end of the linear representation  
202 of the chromosome (**Fig. 1**). The broad coverage spike in the Nanopore workflow had  
203 seemingly no relationship to local GC content.

204 To verify the coverage spikes and to rule out the possibility of misassembly resulting in  
205 an underestimation of the number of rRNA loci, further experiments were performed.

206 Firstly, ddPCR was used to compare the ratio of a region of the small SSU rRNA to two  
207 other single copy genes. Ratios of 9.4 and 11.0 SSU rRNA were found to the two other  
208 loci, respectively, by ddPCR. These ratios (9.4 and 11.0) are close to the number of  
209 rRNA loci annotated in the C1 assembly. This supports the inference that there are  
210 about nine rRNA loci in the C1 chromosome as presented in the assembly, and dispels  
211 the notion that there are significantly more than nine (up to 72 based on 8.0-fold over-  
212 coverage) rRNA loci based on the abovementioned high relative coverage of the rRNA  
213 loci in four out of the five sequencing datasets.

214 Secondly, the MiSeq workflow was used to sequence an equimolar mixture of two 5.3  
215 kb PCR products of two loci from *Fusobacterium sp. C1* with GC contents of 30.2% (a  
216 locus containing coding-sequences and intergenic sequences) and 45.5% (a locus  
217 containing rRNA-encoding genes and intergenic regions). This approach was to  
218 facilitate separating local GC content from global genome signatures, such as the fact  
219 that the majority of the genome is GC-poor, while primarily only the rRNA loci are GC-  
220 optimal. The 45.5% GC fragment evidenced higher coverage with 4.14-, 10.63- and  
221 5.39-fold (3 replicates) more reads mapping to it than to the 30.2% GC fragment. This  
222 further supports the hypothesis that there are coverage biases related to GC content  
223 inherent in our Nextera XT/ MiSeq workflow. Further information on this experiment, and  
224 a plot illustrating sequencing coverage overlaid upon GC content are available in

225 **Additional files 2 - 4.**

226

## 227 **Manifestation of GC-biases in various HTS workflows**

228 We then examined GC-related coverage biases in the MiSeq-based genome  
229 sequencing of ten different bacteria with average GC contents ranging from 28.9% to  
230 62.4% (**Additional file 1**). These were all produced using the same workflow involving  
231 transposon-mediated cleaving and tagging (tagmentation) of DNA and 14 PCR cycles.  
232 Coverage was assessed in 500 bp wide sliding windows, and the coverage was  
233 normalised by dividing by the average coverage of the 49% GC genomic windows. The  
234 choice of 49% was simply because all bacteria sequenced in this work have sufficient  
235 (at least 3) numbers of 500 nt genomic windows with 49% GC content. The normalised  
236 coverage was log-transformed in the plots presenting the results. In every case,  
237 sequencing libraries were prepared following the same workflow with the Nextera XT  
238 DNA library prep kit. From plots of normalised relative coverage versus GC content  
239 (**Fig. 2**), it can be seen that a local GC content of between approx. 50%-60% is optimal,  
240 and the relative coverage decreases considerably as the local GC content becomes  
241 more dissimilar from the optimal range. The relatively small error-bars (standard  
242 deviations) seen in **Fig. 2** indicate that there generally isn't considerable variation in  
243 relative coverage among the various individual 500 nt genomic windows of the same  
244 GC content, suggesting that relative coverage and local GC content are tightly  
245 correlated. This corroborates the sharper peaks of the MiSeq dataset compared with the  
246 HiSeq and PacBio datasets (**Fig. 1**). An overlaid plot (**Additional file 5 part A**) from all  
247 experiments in **Fig. 2** shows that the GC content related coverage bias is dependent  
248 primarily on the local GC content and is not affected in a big way by other factors such  
249 as global GC content or other sequence signatures. In fact, a quadratic curve could be

250 fitted reasonably well ( $R^2 = 0.97$ ) to the overlaid plot of normalised relative coverage  
251 versus local GC content (**Additional file 5 part A**).

252 The median qualities (Phred scores) of MiSeq reads were high for reads with GC  
253 contents below approximately 65%, but decreased above this GC level (**Additional file**  
254 **6**). This decrease in quality above 65% GC content resulted in reads with high-GC  
255 content being more affected by quality filtering than reads with moderate or low-GC  
256 content (**Additional file 7**).

257 We also have NextSeq datasets derived from Nextera XT libraries for the genome  
258 sequencing of five different bacteria, ranging in GC content from 28.9% to 63.0%  
259 (**Additional file 1, Fig. 3**). This data was produced similarly to the MiSeq data where  
260 library preparation involved tagmentation and 14 PCR cycles. In these, the normalised  
261 relative coverages decreased as the local GC contents decreased below ca. 55% in all  
262 but the *Aminobacter* dataset. *Aminobacter* had the highest global GC content (63%) in  
263 this study and its NextSeq dataset evidenced almost no coverage bias related to local  
264 GC content between 41% and 74%. The *Rhizobium* NextSeq dataset, with local GC  
265 content ranging from 39% to 70% showed decreased relative coverage as the local GC  
266 content decreased below 55%, and very little coverage bias above 55% local GC  
267 content. The five NextSeq datasets do not overlay upon each other (**Additional file 5**  
268 **part B**) as well as the ten MiSeq datasets (**Additional file 5 part A**), as judged visually,  
269 nor do they align as closely with the quadratic curve of best fit ( $R^2 = 0.91$ ) (**Additional**  
270 **file 5 part B**). The small error bars seen in the NextSeq plots (**Fig. 3**) corroborate the  
271 sharpness of the peaks in **Fig. 1**, indicating that local coverage of the NextSeq data, as  
272 was also the case for the MiSeq data, is tightly correlated with local GC content.

273 NextSeq reads were not affected by quality filtering with respect to GC content in the  
274 manner in which the MiSeq reads were (**Additional file 7**), despite the fact that these  
275 reads had lower quality scores where their GC contents were over c.a. 65% (**Additional**  
276 **file 6**).

277 Two PacBio datasets (produced using a PCR-free protocol), from *Fusobacterium* and  
278 *Sphingobium* which differ greatly in global GC content, were also examined for  
279 coverage biases (**Fig. 3**). The *Sphingobium* PacBio dataset showed almost no GC-bias  
280 between 38% and 76% local GC content and very consistent coverage as judged by the  
281 very small error bars in **Fig. 3**. Below 40% local GC content, the *Fusobacterium* dataset  
282 evidenced lower relative coverage, while the large error bars in this range show that the  
283 relative coverage is highly variable, indicating that factors other than local GC content  
284 have an influence on the relative coverage in the PacBio sequencing workflow in a  
285 predominantly low GC content background. A single HiSeq dataset for *Fusobacterium*  
286 also evidenced several fold- (up to almost 10 fold-) under-coverage and large error bars  
287 for windows with less than 40% local GC content (**Fig. 3**), indicating that the HiSeq  
288 workflow's relative coverage is also affected by factors other than local GC content. The  
289 HiSeq dataset evidenced normal relative coverage from 40% to 55% local GC content.  
290 This HiSeq data derived from a workflow involving sonication to shear DNA, followed by  
291 blunt-ending, adapter ligation and 11 cycles of PCR.

292 Two Nanopore datasets were produced with PCR-free workflows for organisms with low  
293 and high global GC contents, *Fusobacterium* (28.9% GC) and *Aminobacter* (63.0%  
294 GC). Both of these datasets evidenced no major relative coverage biases related to  
295 local GC content (**Fig. 3**) and the error bars were generally quite small, suggesting that

296 the Nanopore workflow gives very even coverage across a wide range of GC contents  
297 and in different local genomic contexts.

298

## 299 **GC-biases in metagenome datasets**

300 The effects of GC content were also investigated in five independent metagenome  
301 datasets. These datasets were from different environments where the microbial  
302 communities would be expected to have different complexities. Furthermore, the  
303 datasets were prepared following different workflows and using different sequencing  
304 platforms (Table 1). Given that there were no 1% wide GC-bins common to all contigs in  
305 these assemblies, the GC-biases were presented in a different manner to the single  
306 genome datasets above (see Methods), by presenting log-transformed coverage ratios  
307 in pairs of 1% wide GC-bins within each contig in 3-dimensional plots (**Additional files**  
308 **8 - 12**). In these, it can be seen that the GC-biases differed considerably between  
309 datasets. In ERR526087 (human female fecal metagenome), it is seen that GC-bins of  
310 approx. 45% received optimal coverage, while the relative coverage decreased as the  
311 GC content increased above or decreased below this optimum. In SRR8570466  
312 (moving bed biofilm reactor metagenome) there was little or no GC-bias between 40%  
313 and 70% while the relative coverage decreased outside of this range. In SRR5035895  
314 (kelp-associated biofilm metagenome), the relative coverage increased with increasing  
315 GC content between 25% and 67%. In SRS049959 (human male fecal metagenome),  
316 optimal coverage was seen for GC contents between 17% and 36% and relative  
317 coverage decreased as the GC content increased above 36%. In the SRR7521238  
318 (vulture gut) metagenome dataset, optimal coverage occurred between about 50% and

319 60% GC content, with the relative coverage decreasing as the GC content increased  
320 above or decreased below this optimal range.

321

## 322 **Discussion**

323 The overarching aim of this study was to improve the general understanding about the  
324 impacts that GC-related coverage biases may have on abundance estimates of species  
325 or functions / pathways in HTS-based shotgun metagenomics experiments. However,  
326 we firstly presented results describing GC-biases in the sequencing of single bacterial  
327 genomes. The reason for this is that subsets of bacterial chromosomes with differing  
328 GC contents are equally abundant, if one can assume minimal effects from replication  
329 forks, which facilitates a thorough investigation of GC-biases within a single molecule.  
330 The *Fusobacterium* sp. C1 genome sequence presented here was from an isolated  
331 representative of the dominant operational taxonomic unit in new world vulture  
332 gastrointestinal tracts detected by amplicon analysis (SSU rRNA) [16]. In our attempt at  
333 sequencing this strain's genome we found such severe coverage biases seemingly  
334 linked to GC content that we considered it pertinent to seek further validation of the  
335 copy number of rRNA loci via ddPCR. The problem of coverage of the rRNA loci in  
336 particular arose because the majority of CDSs and intergenic regions in *Fusobacterium*  
337 sp. C1 have low-GC contents, while its rRNA genes are typical with respect to other  
338 prokaryotes in having balanced (between 50% and 60%) GC contents (**Additional file**  
339 **13**, [17]). This discrepancy in GC contents is almost certainly responsible for the under-  
340 coverage of the majority of the C1 assembly relative to the rRNA loci. From our results,



341 we would predict that SSU rRNA amplicon studies would be less sensitive to GC-bias  
342 than shotgun metagenomics owing to the narrow range in GC content typically  
343 associated with SSU rRNA (**Additional file 13**) which also corresponds to the optimal  
344 GC range in our NexteraXT/MiSeq workflow. This is not to downplay the extent of other  
345 biases in amplicon surveys, such as those related to DNA extraction from a wide variety  
346 of cell types, (degenerate) primer annealing and variations in SSU rRNA copy number  
347 between species [3, 18]. However, in a shotgun metagenome survey (which also suffers  
348 from the abovementioned DNA extraction biases) the under-coverage of the  
349 predominantly GC-poor regions of *Fusobacterium* sp. C1's genome would, based on  
350 results presented here, result in a severe underestimation of its relative abundance. It  
351 was this notion that prompted us to delve deeper into assessing the relationships  
352 between GC content and coverage in various HTS platforms.

353 Results presented here showed that local GC content correlated well with coverage  
354 biases in MiSeq and NextSeq datasets produced from libraries made using Nextera XT  
355 kits. Furthermore, after normalising coverage data and performing polynomial  
356 regression, approximate descriptions of GC-bias profiles in mathematical terms were  
357 derived for our MiSeq and NextSeq workflows. The quadratic equations presented in  
358 **Additional file 5** are perhaps not the most accurate descriptions of GC-bias possible,  
359 based on deviations of the data points from the quadratic curves, especially at the  
360 extremities of the explored GC content. This suggests that the GC-biasing  
361 mechanism(s) don't follow exactly the relationships implied by the quadratic  
362 expressions. Nonetheless, the proximity of the data points to the quadratic regression  
363 curves (**Additional file 5**) is quite good considering that coverage would, in theory, be

364 described in such plots (**Additional file 5**) as the line “y=0” if there was no coverage  
365 bias due to local GC content. It could be argued that there is a combination of at least  
366 two different GC-biasing mechanisms at work in the MiSeq workflow. One of these is  
367 linked to the fact that reads with high-GC content generally have lower quality (Phred  
368 scores) (**Additional file 6**) and quality filtering affected high-GC reads (c.a. > 65% GC)  
369 more than other reads with balanced and low GC contents (**Additional file 7**). It could  
370 be the case that the reduction in the proportions of reads passing quality filtering  
371 between around 65% to 80% GC content in the *Agrobacterium*, *Ensifer*, and  
372 *Sphingobium* MiSeq datasets could be predominantly responsible for the corresponding  
373 declines in the relative coverage seen above 65% GC content (Figure 2). The NextSeq  
374 reads did not show such a trend of quality filtering disproportionately affecting reads of  
375 between 65% and 80% GC content. This may explain why the NextSeq datasets have  
376 unchanging relative coverage between about 55% and 72% GC content, at least for the  
377 *Rhizobium* and *Aminobacter* datasets (**Figure 3**). The lower relative coverage at low-  
378 GC contents evident in the MiSeq and NextSeq datasets is not linked to quality filtering  
379 of the reads, indicating that the mechanisms biasing against GC-rich and GC-poor  
380 windows are different. It can also be concluded that quality filtering was not largely  
381 responsible for the GC-bias in the HiSeq dataset (Figure 3, Additional file 7), though our  
382 HiSeq data is representative of only low and moderate GC contents. Though it is clear  
383 that the quality filtering resulted in at least some of the under-coverage seen at higher  
384 GC contents, we still maintain that it is correct to refer to this effect as "GC-bias", as  
385 quality filtering is a necessary part of data analysis and the low quality is related to the  
386 sequencer not being capable of calling bases with high confidence in high-GC reads.

387 GC-related coverage biases were seen in HiSeq and PacBio workflows (at least for  
388 *Fusobacterium* sp. C1) in a manner clearly different to an approximate polynomial curve  
389 (**Fig. 3**). Another facet of the differences between GC-bias profiles among HTS  
390 workflows is seen in the error bars of the plots of the HiSeq and PacBio datasets which,  
391 for low-GC regions (< 40% GC) are large in comparison with the error bars seen in the  
392 plots of the MiSeq, NextSeq, and Nanopore datasets. Based on the sharpness of the  
393 peaks (indicating coverage) in **Fig. 1** corresponding to changes in GC content for MiSeq  
394 and NextSeq data in comparison with the wider corresponding peaks of PacBio and  
395 HiSeq coverage plots, it is possible that another factor co-governing coverage biases in  
396 the HiSeq and PacBio workflows is proximity to a region of balanced (c.a. 50% to 60%)  
397 GC content. It could possibly be the case that linkage of GC-poor loci to GC-optimal loci  
398 (c.a. 50%) results in more efficient recovery of low-GC DNA proximal to rRNA loci, if it is  
399 the case that heat production from bead-beating (partially) denatures DNA before it is  
400 bound to a silica column. This would be similar to the bias introduced against GC-poor  
401 loci during DNA extraction from agarose gel slices described elsewhere [12]. This was  
402 not investigated further here as we aimed to investigate GC-biases inherent to HTS  
403 workflows without going into details of which mechanisms within each workflow  
404 introduced biases.

405 The even coverage of the Nanopore datasets over a wide range of GC contents, albeit  
406 for only two organisms with very different global GC contents, is promising, especially  
407 for metagenome sequencing where long reads will greatly simplify assembly. The  
408 application of Nanopore technology to metagenomics is currently still limited by cost,  
409 read quality and throughput, though this situation has been improving considerably ever

410 since the development of the technology [19]. In the meantime, when a combination of  
411 sequencing platforms are being used (e.g. if using long reads to improve assembly in  
412 combination with short reads to provide high coverage), there is the possibility that  
413 Nanopore reads, or reads derived from any other demonstrably unbiased HTS  
414 workflow, could be used as an internal standard to evaluate and perhaps correct for  
415 GC-biases or other coverage biases from cheaper or more high-throughput, but biased,  
416 workflows.

417 The examination of the GC-biases in five different workflows is informative even for  
418 single genome sequencing. It is perhaps unsurprising that the PCR-based Nextera XT  
419 workflow producing libraries for MiSeq and NextSeq would be heavily GC-biased. It has  
420 been reported previously that extreme GC content can complicate a single genome  
421 sequencing project [6, 9, 13] and our results are illustrative of why this is the case,  
422 showing, for example, 10-fold or worse under-coverage of GC windows under 30% in  
423 MiSeq data. However, the lack of PCR in the library preparation for the PacBio workflow  
424 did not completely alleviate GC-bias, although it would appear to have been lessened,  
425 and there exists the possibility that the primary bias in this workflow could have been  
426 introduced at the stage of DNA isolation. It is, perhaps, curious that the PacBio and  
427 HiSeq workflows gave similar profiles of GC-bias despite the PacBio workflow having no  
428 PCR and the HiSeq workflow having 11 PCR cycles. It is commonly taken as best  
429 practice to use a PCR-free sequencing library preparation method for metagenomic  
430 studies when sample biomass isn't limiting [12, 20], but, nonetheless, it can be seen  
431 that PCR is not the only major contributor to GC-bias in HTS.

432 We have shown the occurrence of GC-biases in five independent metagenome datasets  
433 in order to illustrate the points also addressed with the single genome experiments,  
434 namely that there are GC-dependent coverage biases which manifest in a manner  
435 dependent upon the particular workflow employed. The production of these datasets  
436 encompassed a range of different sequencing technologies and library preparation  
437 workflows with between four to fourteen PCR cycles in each case. Because of this, the  
438 profile and severity of GC-biases differed considerably between these datasets  
439 (**Additional files 8 - 12**). Owing to the fact that PCR is commonly cited as a major  
440 contributor to GC-bias [13], it is often recommended to reduce the number of PCR  
441 cycles (or to eliminate PCR altogether) as far as sample biomass and other  
442 experimental constraints allow [21]. We did not design our experiments nor analyses to  
443 assess the individual contributions to GC-bias from any of the individual steps of library  
444 preparation, but work here and elsewhere also indicates that there are sources of GC-  
445 bias other than PCR [9, 21]. The analysis of the metagenome datasets reiterated the  
446 observation from the single genome sequencing datasets where GC-biases differ  
447 between different sequencing workflows and highlights how important it is to consider  
448 this before committing to an experimental workflow. Furthermore, if the GC-bias profile  
449 in a metagenome dataset is assessed following an assembly of the data, it may be  
450 possible to estimate parameters to be used to reduce abundance estimate errors due to  
451 GC-bias. However, we did not explore the application of corrections to account for GC-  
452 bias during data processing in this work.

453 Even for sequencing projects employing the same sequencing technology with the  
454 same library preparation workflows, it must be considered that there could be within-

455 and between-lab variation. For instance, it is possible that differences in equipment /  
456 instrumentation (e.g. in ramp rates of thermocyclers [13]) between labs otherwise  
457 employing the same protocols could alter the GC-biases. And naturally, the use of  
458 different HTS workflows (including the use of different library preparation kits, different  
459 fragmentation methods, different DNA polymerases etc.) would be expected to alter the  
460 relationships between GC content and coverage considerably [5-8, 12, 13]. As  
461 discussed in the introduction, PCR additives can be used to mitigate the under-  
462 coverage of low- or high-GC regions, but these approaches tend to exacerbate biases  
463 in other regions. Thus, such an approach can possibly find utility in single genome  
464 sequencing, but is not viable for metagenome sequencing. For this reason, it may be  
465 even more important in metagenomic studies to understand the GC-biases inherent in a  
466 sequencing workflow and account for them during data analysis.

467 The relationships between local GC content and relative coverage presented here for  
468 single bacterial genome sequencing agree, at least qualitatively, with data published  
469 elsewhere [11, 13], in that low and high-GC regions suffer from under-coverage in  
470 comparison with GC neutral regions. The strong bias against GC-poor loci, as in the  
471 genome of *Fusobacterium* here, was previously reported for the genome of the  
472 important pathogen *Plasmodium falciparum* (19.3% GC average) [5]. However, our  
473 results also contradict some other findings, such as where it was reported that 30% GC  
474 regions were more highly covered than 50% GC regions for MiSeq and PacBio data [9].  
475 Those data sets were produced in workflows employing different library production  
476 protocols to our in-house data, illustrating the point made above, that there can be  
477 differences in coverage biases between different labs which employ different HTS

478 workflows, necessitating that any attempt at accounting for GC-biases must be  
479 calibrated to the protocols and equipment in each lab separately.

480 Nonetheless, we propose that strategies similar to the coverage normalisation  
481 procedures described herein (<https://github.com/padbr/gcbias>) could be a basis for  
482 generating lab-specific and protocol-specific descriptions of GC-bias, at least in  
483 qualitative terms. However, it is uncertain how consistently HTS workflows will conform  
484 to previously derived descriptions of GC-bias profiles for each individual workflow, as  
485 illustrated by the differences in the GC-biases between our NextSeq datasets. For this  
486 reason, we would recommend extreme caution in naively using polynomial / quadratic  
487 regression as a model to describe normalised local-GC content versus coverage in  
488 NexteraXT libraries sequenced with MiSeq or NextSeq despite how consistently we  
489 have shown this to describe GC-biases in such datasets from our group. One major  
490 drawback of our coverage normalisation procedures for bacterial genome sequencing  
491 GC-bias analyses is that it relies on normalising to the average coverage in a single 1%  
492 wide GC-bin (49% GC) for each molecule (chromosome). This would make it not  
493 feasible to have a single normalisation procedure that would work on genomes with very  
494 low to very high average GC contents as not all of these would have a sufficient number  
495 of 49% GC windows, and was the reason why we employed a different protocol to  
496 visually present the GC-biases in metagenome datasets. It could be possible to account  
497 for GC-biases in a metagenome dataset by characterising the biases as we have  
498 described and adjusting the relative coverage levels in a GC-dependent manner.  
499 Alternatively, a workflow inherently devoid of GC-bias, such as the Nanopore



500 sequencing workflow used here, could be used for metagenome sequencing, albeit at a  
501 higher cost or with lower coverage.

502

## 503 **Potential implications**

504 HTS is being applied ever more frequently in genome and metagenome sequencing  
505 based investigations. GC-biases are prevalent in HTS datasets produced from a wide  
506 variety of library building and sequencing platforms, with the notable exception of the  
507 Nanopore workflow used here. Some of the most obvious and serious implications of  
508 uneven coverage in HTS include skewed abundance estimates in metagenomics  
509 projects and the presence of gaps in genome assemblies due to systematic under  
510 coverage of low- or high-GC loci. To our knowledge, no metagenomics data analysis  
511 pipeline currently accounts for GC-biases for the purposes of estimating species, gene  
512 or pathway (etc.) abundances. While many researchers may be aware of the existence  
513 of GC-biases, the manifestation of GC-biases differs between HTS workflows, which  
514 may make it difficult for researchers to understand how their HTS workflows are  
515 affected by GC-bias. For instance we show less than 10-fold under-coverage for 30%  
516 GC windows, worsening to around 30-fold under-coverage for 20% GC windows in our  
517 MiSeq workflow. To address this issue, we have, along with this article, made available  
518 a bioinformatics pipeline that can facilitate researchers in easily getting an  
519 understanding, at least in qualitative terms, of the GC-biases in their HTS workflows,  
520 using data they may already have to hand.

521 Such understanding of GC-biases can be used to find solutions to various problems.  
522 For example, if a lab / research group routinely performs a lot of genome sequencing  
523 followed by assembly, they may supplement their normal library preparation protocol,  
524 for instance with PCR additives, to alter GC-biases, using the pipeline here to  
525 understand the effects of their alterations. This approach could facilitate making smarter  
526 choices in the lab to maximise the fitness for purpose of datasets or making workflows  
527 more cost effective. Alternatively, if feasible, they may employ an inherently less biases  
528 (unbiased even) work flow, such as the Nanopore workflow here. Another obvious  
529 implication of understanding GC-biases could be a better interpretation of metagenomic  
530 data, or possibly even correcting abundance estimates for GC-biases. In cases of HTS  
531 workflows featuring extreme GC-biases, such as seen for Nextera XT followed by  
532 MiSeq or NextSeq sequencing, it would be extremely advantageous to account for GC-  
533 biases during data analysis, while for other HTS workflows subject to very little GC-bias  
534 (e.g. the Nanopore workflow), it may prove futile to attempt to improve abundance  
535 estimate accuracies by accounting for GC-bias. A less obvious approach in the field of  
536 metagenomics would be to actually take advantage of GC-bias. For instance, it may be  
537 possible in some cases to use additives in the PCR step of metagenome library  
538 preparation to adjust the GC-bias in favour of the average GC content of a non-  
539 culturable organism for which a de novo assembly is desired from metagenome reads.  
540 Ultimately, knowledge regarding the biases inherent in the production of a dataset can  
541 yield options to optimise the suitability of the data for the research questions and  
542 facilitate a more accurate interpretation of the data during analysis.

543

## 544 **Methods**

### 545 **Strain isolation**

546 The model organism primarily and initially used to investigate coverage biases,  
547 *Fusobacterium sp. C1*, was isolated from a frozen sample of the contents of a vulture's  
548 large intestine. The sample was thawed, serially diluted and spread on anaerobic  
549 medium plates (Statens Serum Institut) in an anaerobic jar with an environment  
550 consisting of 90% N<sub>2</sub> and 10% H<sub>2</sub> at 37 °C. The isolate was purified with several rounds  
551 of streaking in the same conditions.

552

### 553 **Genome sequencing, assembly and annotation**

554 DNA isolation was performed using the UltraClean Microbial DNA isolation kit (MoBio)  
555 in all cases except for the ddPCR experiment and Nanopore library preparations for  
556 which high molecular weight DNA was isolated using the Genomic Mini AX Bacteria kit  
557 (A&A Biotechnology). For MiSeq (2x251 bp paired reads) and NextSeq (2x151 bp  
558 paired reads), libraries were prepared using the Nextera XT V2 Sample preparation kit  
559 (Illumina) according to the manufacturer's instructions with the modification of  
560 increasing the number of PCR cycles from 12 to 14 during the library amplification step.

561 In the HiSeq workflow, genomic DNA was sheared using a Bioruptor® XL (Diagenode,  
562 Inc), with 6 rounds of 15 seconds sonication separated by 90 second intervals. Sheared  
563 DNA was converted into Illumina compatible libraries using a NEBNext library kit  
564 (E6070L) using adapters described elsewhere [22]. Following this, the library was  
565 amplified with 11 cycles of PCR using AmpliTaq Gold polymerase (Applied Biosystems,

566 Foster City, CA) and cleaned using Agencourt AMPure XP (Beckman Coulter, Inc) bead  
567 purification, following the manufacturer's protocol.

568 For Nanopore and PacBio sequencing, high molecular weight (HMW) DNA was  
569 routinely extracted from liquid cultures of bacteria using the Genomic Mini AX Bacteria  
570 kit (A&A Biotechnology (060-60)). Nanopore libraries were prepared with the Rapid  
571 Sequencing kit (SQK-RAD004) and sequenced on a FLO-MIN106 flow cell. Reads were  
572 basecalled using Albacore V.2.3.0. PacBio sequencing was performed as described  
573 elsewhere [23], with sequencing libraries being prepared using a PCR free ligation of  
574 sequencing adapters to fragmented blunt-ended double-stranded DNA.

575 Adapter contaminants and low quality 3' ends were trimmed from the Illumina reads with  
576 Cutadapt v1.8.3 [24]. Nanopore reads were cleaned with Porechop V.0.2.3. PacBio  
577 reads were quality filtered, adapter filtered and converted from \*.bax.h5 to fastq format  
578 using pls2fasta from the blasr package (v1.0.0.126414) [25]. Paired Illumina reads were  
579 merged with AdapterRemoval v2.1.0 [26] and assembled using SPAdes v3.10 [27]. For  
580 *Fusobacterium* sp. C1, assembly was performed with Unicycler v0.4.3 running SPAdes  
581 v3.11.0 and racon using only NextSeq and Nanopore reads. For *Sphingobium*  
582 *herbicidovorans* MH, a publically available assembly was used (CP020538-42). Where  
583 necessary, the RAST annotation server [28] was used to predict coding sequences  
584 (CDSs), rRNAs and tRNAs. Circular plots of genome assembly and annotation  
585 information were made using BRIG [29]. All genome sequencing reads generated in this  
586 work were deposited to SRA under the BioProject number PRJNA503577.

587

## 588 **Coverage evenness assessment of isolate genome sequencing**

589 Cleaned, quality filtered sequencing reads were aligned to their draft genome  
590 assemblies using bwa-mem v0.7.15-r1140 [30] for MiSeq, NextSeq and HiSeq reads or  
591 minimap2 [31] for Nanopore and PacBio reads. For paired reads, the merged and  
592 unmerged reads were mapped separately to their reference assemblies and the  
593 resulting alignment files were merged using samtools merge [32]. Secondary and  
594 supplementary alignments were removed using samtools view with the flag '-F 0x900'.  
595 The coverage at each nucleotide position was calculated using samtools v1.4.1 (depth -  
596 a option) [32]. Since abnormal coverage (relative to the chromosome(s)) can arise from  
597 multicopy plasmids, phages, unresolved repeats [10] etc., contigs shorter than 10 kb  
598 were discarded and then contigs (longer than 10 kb) with abnormal coverages were  
599 identified using a modified z-score based on median absolute deviation with a threshold  
600 of 10 [33] and removed from further analyses. The exceptions were that the length  
601 cutoff was increased to 100,000 for the *Aminobacter* assembly due to highly variable  
602 coverage in contigs between 10,000 bp and 100,000 bp, and the elements annotated as  
603 plasmids for *Sphingobium herbicidovorans* MH were manually removed. Local GC  
604 contents and sequencing coverages were calculated in 500 nt sliding windows, in a  
605 similar approach to elsewhere [13], unless otherwise specified. Coverages were  
606 normalised by binning the coverage windows by GC content, with bins being 1% wide,  
607 and the coverages of all windows were divided by the average coverage of the windows  
608 binned at 49% GC. The choice of 49% GC as a baseline was due to the fact that all of  
609 our in-house datasets had at least three 500 nt windows with this GC content. GC  
610 percentage windows with less than three points were discarded. Polynomial regression

611 was performed on the log-transformed average coverage of each 1% wide GC-bin using  
612 the polyfit function of python's numpy package with two degrees of polynomial fitting  
613 and weights set to the number of windows for each 1% wide GC-bin. The conclusions  
614 derived from the results presented here are not affected by the choice of a sliding  
615 window width of 500 nt. This was asserted by repeating the analyses using window  
616 sizes ranging from 50 nt to 5000 nt (Additional file 14). The deviations indicated by the  
617 error bars were a little larger for smaller windows, while there were fewer windows with  
618 less extreme GC contents when looking at large window sizes. Nonetheless, the overall  
619 trends in the analyses remain very consistent regardless of window size. Further  
620 information, including source code for in-house scripts, is available at  
621 <https://github.com/padbr/gcbias>.

622

### 623 **Metagenome assembly and coverage evenness assessment**

624 Metagenome datasets were retrieved from several sources. Datasets ERR526087 (2 x  
625 100bp) and SRR5035895 (2 x 300 bp) were retrieved with the fastq-dump utility of the  
626 SRA toolkit V.2.9.0. The longest reads in these datasets were split in half in order to  
627 retrieve the original read pairs, while shorter reads, presumably trimmed for quality or  
628 removing technical sequences, were discarded since the read pairs were concatenated  
629 without annotation of the concatenation point making it impossible to recover the  
630 original paired reads. SRS049959 (2 x 100bp) was downloaded from the human  
631 metagenome project website with ftp. Raw metagenome read datasets for SRR7521238  
632 and SRR8570466 were available in-house due to our affiliations with the respective  
633 data producers [15, 16, 34]. The library preparation protocols varied between these

634 datasets (Table 1). Adapter contaminants and low quality 3' ends were trimmed from  
635 the reads with Cutadapt v1.8.3 [24] using TrimGalore as a wrapper script [35]. The  
636 datasets of ERR526087, SRR5035895 and SRR7521238 were assembled using IDBA-  
637 UD [36]. The dataset of SRR8570466 was assembled with MegaHit [37] as described  
638 previously [15]. The assembly accompanying dataset SRS049959 in the  
639 abovementioned ftp site of the human metagenome project was used.

640 Quality-filtered sequencing reads were mapped to metagenome assemblies using bwa-  
641 mem v0.7.15-r1140 [30]. Following this, contigs shorter than 10 kb were discarded for  
642 reasons described above. Read depths in 500 nt sliding windows in each contig were  
643 calculated as described above. However, metagenome contigs larger than 10 kb were  
644 not subject to coverage-based filtering as each contig is treated as coming from an  
645 independent genetic element, and normalisation is performed within each contig (see  
646 below). This contrasts with the approach taken for the whole genome sequencing  
647 experiments where each contig passing all filtering steps is considered equally  
648 abundant. The difference in approach stems from the fact that too many contigs in  
649 metagenome assemblies will not have a chosen common GC-bin (e.g. 49%) and this  
650 would lead to severely reduced representation of contigs derived from genomes with  
651 high or low global GC contents. Within each metagenome contig, the 500 nt windows  
652 were binned by GC content into 1% wide bins and the average coverage of each 1%  
653 wide GC-bin was calculated within each contig. The coverage ratios of all pairwise  
654 combinations of GC-bins within each contig were then calculated (i.e. the coverage ratio  
655 is a ratio of the average coverage of a 1% wide numerator GC-bin to the average  
656 coverage of a 1% wide denominator GC-bin). Following this, the coverage ratio values

657 for each combination of two 1% wide GC-bins were averaged across all contigs that  
658 contain the relevant two GC-bins. These ratios were then log-transformed (base 10),  
659 such that values greater than zero indicated that metagenomic windows of the  
660 numerator's GC content are more covered than windows of the denominator's GC  
661 content and vice versa for values less than zero. These three dimensional data were  
662 plotted and rendered from a series of azimuth angles and elevations using the  
663 matplotlib and mpl\_toolkits libraries of python. The images were saved in bitmap format,  
664 and the series of images were assembled, using ffmpeg V.3.4.2-2  
665 (<https://www.ffmpeg.org>), into a video file to facilitate viewing of the plots in three  
666 dimensions. The pipelines to calculate coverage ratios between different metagenomics  
667 windows with different GC contents, along with source code for in-house scripts, is  
668 detailed in <https://github.com/padbr/gcbias>.

669

## 670 **Quality of Illumina reads with respect to GC content**

671 Raw Illumina reads were adapter trimmed with cutadapt (i) with quality filtering disabled,  
672 and (ii) with default quality filtering settings. Custom biopython scripts were used to  
673 evaluate the effects of quality filtering on the GC content of reads. The scripts calculated  
674 the GC content of each read and the median quality (Phred score) of each read within a  
675 dataset. The median quality values of reads of each GC content percentile were plotted  
676 using the boxplot function of matplotlib in python (Additional file 6). Furthermore,  
677 frequency distributions of the GC contents of reads with and without quality filtering  
678 were plotted using the hist function of matplotlib in python. Following this, relative  
679 proportions of reads for each GC content bin in the histogram were calculated by



680 dividing the proportions of the quality filtered reads by the corresponding proportions  
681 from the non-quality filtered reads (Additional file 7).

682

### 683 **ddPCR**

684 A pangenome analysis was performed, following the methods described in [38], on  
685 *Fusobacterium sp. C1* and 18 other draft and complete *Fusobacterium* genomes  
686 (**Additional file 15**). From this, two single copy core genes were selected and primers  
687 targeting these and SSU rRNA were designed (Table 2). *Fusobacterium sp. C1* genomic  
688 DNA was double digested with HindIII and DraI (NEB). ddPCR was performed to  
689 assess the ratio of SSU rRNA genes to two different single copy genes. ddPCR was  
690 performed using the QX-200 ddPCR system (Bio-Rad), using EvaGreen ddPCR  
691 Supermix. Data analyses were performed using QuantaSoft™ Analysis Pro software  
692 (Bio-Rad). Further details are available in **Additional file 2**.

693

694

### 695 **Long range PCR product sequencing**

696 Primers were designed to uniquely amplify two different 5.3 kb regions of the  
697 *Fusobacterium sp. C1* genome with different GC contents: 30.2% (**Fig. 1, circle 3,**  
698 **green bar**) and 45.5% (**Fig. 1, circle 3, red bar**) (Table 3). Post amplification, the PCR  
699 products were quantified based on Qubit measurements and pooled into an equimolar  
700 mixture. Three independent paired PCR product mixtures were prepared in this manner  
701 (further details available in **Additional file 2**). Indexed libraries were prepared from

702 these pools using the Nextera XT kit and sequencing was performed on a MiSeq, as  
703 described for genome sequencing.

704

## 705 **Availability of source code and requirements**

706 Project name: gcbias

707 Project home page: <https://github.com/padbr/gcbias>

708 Operating system: Linux - probably Linux in general, but only tested with Ubuntu and

709 CentOS

710 Programming language: python2.7, bash

711 Other requirements: bwa, samtools ( $\geq 1.0$ ), ffmpeg, minimap2

712 License: MIT license

713 Any restrictions to use by non-academics: No restrictions

714

## 715 **Availability of supporting data and materials**

716 All sequencing reads associated with this project were deposited to SRA under

717 BioProject accession number PRJNA503577.

718

719 **Declarations**

720 **List of abbreviations**

721 HTS: high-throughput sequencing

722 SSU: small subunit

723 ddPCR: digital droplet PCR

724

725 **Consent for publication**

726 Not applicable

727

728 **Competing interests**

729 The authors declare that they have no competing interests

730

731 **Funding**

732 PB was supported by a Villum Foundation Block Stipend. TKN and LHH were supported  
733 by a grant (ORIGENE) from Aarhus University research fund (AUFF NOVA). MTPG was  
734 supported by a grant from the Danish National Advanced Technology Foundation  
735 (Højteknologifonden) (080-2012-3-Food genomics). None of the funding foundations  
736 played no role in the design of the study, the production, analysis and interpretation of  
737 the data nor in the writing of the manuscript.

738

739 **Authors' contributions**

740 The study was designed by LHH, TKN, WK and PDB. Lab work was performed by TKN,  
741 WK, MTPG, LP, MR, AA, and AZ. PDB, TKN, WK and LHH analysed the data. PDB  
742 wrote the paper. All authors revised the paper. All authors read and approved the final  
743 manuscript.

744

745 **Acknowledgements**

746 The authors thank Tina Thane and Tanja Begovic for technical assistance with DNA  
747 extractions and sequencing library preparations.

748

749 **Additional files**

750 **Additional file 1**

751 File name: Additional file 1.docx

752 Format: Microsoft Word; Extension: '.docx'

753 Title of data: Supplementary table 1: Genome sequencing data sets

754 A table describing which workflows were used to sequence which bacteria, and the  
755 accession numbers of each data set in the NCBI's sequence read archive.

756

757 **Additional file 2**

758 File name: Additional file 2.docx

759 Format: Microsoft Word; Extension: '.docx'

760 Title: Supplementary text: Supplementary methods and results

761 Description: Extra detail about the methods and results for the ddPCR analysis and  
762 extra information about the methods for filtering aberrantly covered contigs from  
763 analyses are included herein.

764

765 **Additional file 3**

766 File name: Additional file 3.docx

767 Format: Microsoft Word; Extension: '.docx'

768 Title: Supplementary figure 1

769 Description: Plots showing per-nucleotide coverage and GC content in 49 nt sliding  
770 windows and the positions of rRNA genes and protein coding genes from two 5.3 kb  
771 PCR products sequenced using the MiSeq workflow.

772

773 **Additional file 4**

774 File name: Additional file 4.docx

775 Format: Microsoft word; Extension: '.docx'

776 Title: Supplementary table 2: Numbers of reads mapped to two 5.3 kb equimolar PCR  
777 products from *Fusobacterium*

778 Description: The numbers of reads mapping to each of two 5.3 kb PCR products in each  
779 of three replicates are shown, along with a ratio indicating the relative coverage of each  
780 PCR product.

781

782 **Additional file 5**

783 File name: Additional file 5.docx

784 Format: Microsoft Word; Extension: '.docx'

785 Title: Supplementary figure 2

786 Description: Plots showing GC-biases in MiSeq and NextSeq workflows from several  
787 experiments along with quadratic lines of best fit.

788

789 **Additional file 6**

790 File name: Additional file 6.png

791 Format: png image; Extension: '.png'

792 Title: Supplementary figure 3

793 Description: For each dataset shown, the adapters were trimmed from the reads with  
794 quality filtering disabled. The read quality reads are represented in 1% wide GC-bins.  
795 The orange dashes indicates the medians, the interquartile ranges are represented by  
796 boxes (rectangles) and the whiskers span the 10<sup>th</sup> to the 90<sup>th</sup> percentiles.

797

798 **Additional file 7**

799 File name: Additional file 7.png

800 Format: png image; Extension: '.png'

801 Title: Supplementary figure 4

802 Description: For each dataset shown, the adapters were trimmed from the reads both  
803 with and without quality filtering enabled. Histograms of the proportions of reads at  
804 various GC contents in each dataset were created, with identical bins of GC content for  
805 both datasets. These proportions for the quality filtered data were then divided by the  
806 proportions of the non-quality filtered data. In this way, it can be seen if quality filtering  
807 disproportionately affects the abundance of reads passing quality filtering if the ratio is  
808 significantly different to 1.0. Dark blue bars indicate that the GC-bin had at least 0.1% of  
809 the total abundance of reads in the dataset with quality filtering disabled, and below this  
810 value, the intensity of blue was scaled linearly down to no colour. This colour scaling  
811 focuses attention on the GC contents that are reasonably abundant in the 500 nt  
812 windows in the genomic GC-bias analyses.

813

814 **Additional file 8**

815 File name: Additional file 8.mp4

816 Format: VLC media player; Extension: '.mp4'

817 Title: Supplementary video 1

818 Description: GC-bias in female human faecal metagenome (SRA acc. no. ERR526087).  
819 Movie file showing log-transformed (base 10) average coverage of 500 nt-windows of a  
820 foreground GC content divided by the average coverage of 500 nt-windows of a  
821 background GC content.

822

823 **Additional file 9**

824 File name: Additional file 9.mp4

825 Format: VLC media player; Extension: '.mp4'

826 Title: Supplementary video 2

827 Description: GC-bias in kelp associated biofilm metagenome (SRA acc. no.  
828 SRR5035895). Movie file showing log-transformed (base 10) average coverage of 500  
829 nt-windows of a foreground GC content divided by the average coverage of 500 nt-  
830 windows of a background GC content.

831

832 **Additional file 10**

833 File name: Additional file 10.mp4

834 Format: VLC media player; Extension: '.mp4'

835 Title: Supplementary video 3

836 Description: GC-bias in human male faecal metagenome (SRA acc. no. SRS049959).

837 Movie file showing log-transformed (base 10) average coverage of 500 nt-windows of a



838 foreground GC content divided by the average coverage of 500 nt-windows of a  
839 background GC content.

840

841 **Additional file 11**

842 File name: Additional file 11.mp4

843 Format: VLC media player; Extension: '.mp4'

844 Title: Supplementary video 4

845 Description: GC-bias in moving bed biofilm reactors with effluent wastewater  
846 metagenome (SRA acc. no. SRR8570466). Movie file showing log-transformed (base  
847 10) average coverage of 500 nt-windows of a foreground GC content divided by the  
848 average coverage of 500 nt-windows of a background GC content.

849

850 **Additional file 12**

851 File name: Additional file 12

852 Format: VLC media player; Extension: '.mp4'

853 Title: Supplementary video 5

854 Description: GC-bias in turkey vulture intestinal contents metagenome (SRA acc. no.  
855 SRR7521238). Movie file showing log-transformed (base 10) average coverage of 500  
856 nt-windows of a foreground GC content divided by the average coverage of 500 nt-  
857 windows of a background GC content.

858

859 **Additional file 13**

860 File name: Additional file 13.docx

861 Format: Microsoft Word; Extension: '.docx'

862 Title: Supplementary figure 5

863 Description: Histogram showing GC content of SSU rRNA genes in the greengenes

864 database

865

866 **Additional file 14**

867 File name: Additional file 14.png

868 Format: Bitmap image, '.png'

869 Title: Supplementary figure 6

870 Description: All results presented in figures 2-3 were repeated for a range of different

871 genomic window sizes ranging from 50 nt to 5000 nt. The methodology was the same

872 as presented in figures 2-3, except that the coverage values were not normalized to the

873 coverage of windows with 49% GC, as this was not feasible. Instead, the coverage was

874 normalized according to the average coverage in each dataset.

875

876 **Additional file 15**

877 File name: Additional file 15.docx

878 Format: Microsoft Excel; Extension: '.xlsx'

879 Title: Supplementary table 3: Genome sequences used to identify single copy genes in

880 *Fusobacterium*

881 Description: Accession numbers used in a comparative genomics approach which

882 identified genes as single-copy core genes in the *Fusobacterium* genus. Two of these

883 single-copy core genes were selected as targets for the ddPCR experiment.

884

## 885 References

- 886 1. Reuter Jason A, Spacek DV and Snyder Michael P. High-throughput sequencing  
887 technologies. *Molecular Cell*. 2015;58 4:586-97.  
888 doi:10.1016/j.molcel.2015.05.004.
- 889 2. Schirmer M, Ijaz UZ, D'Amore R, Hall N, Sloan WT and Quince C. Insight into  
890 biases and sequencing errors for amplicon sequencing with the Illumina MiSeq  
891 platform. *Nucleic Acids Res*. 2015;43 6:e37. doi:10.1093/nar/gku1341.
- 892 3. Brooks JP, Edwards DJ, Harwich MD, Rivera MC, Fettweis JM, Serrano MG, et  
893 al. The truth about metagenomics: quantifying and counteracting bias in 16S  
894 rRNA studies. *BMC Microbiol*. 2015;15 1:66. doi:10.1186/s12866-015-0351-6.
- 895 4. Jakobsen TH, Hansen MA, Jensen PØ, Hansen L, Riber L, Cockburn A, et al.  
896 Complete genome sequence of the cystic fibrosis pathogen *Achromobacter*  
897 *xylooxidans* NH44784-1996 complies with important pathogenic phenotypes.  
898 *PLoS One*. 2013;8 7:e68484. doi:10.1371/journal.pone.0068484.
- 899 5. Quail MA, Smith M, Coupland P, Otto TD, Harris SR, Connor TR, et al. A tale of  
900 three next generation sequencing platforms: comparison of Ion Torrent, Pacific  
901 Biosciences and Illumina MiSeq sequencers. *BMC Genomics*. 2012;13 1:341.  
902 doi:10.1186/1471-2164-13-341.
- 903 6. Oyola SO, Otto TD, Gu Y, Maslen G, Manske M, Campino S, et al. Optimizing  
904 illumina next-generation sequencing library preparation for extremely at-biased  
905 genomes. *BMC Genomics*. 2012;13 1:1. doi:10.1186/1471-2164-13-1.
- 906 7. van Dijk EL, Jaszczyszyn Y and Thermes C. Library preparation methods for  
907 next-generation sequencing: Tone down the bias. *Experimental Cell Research*.  
908 2014;322 1:12-20. doi:<http://dx.doi.org/10.1016/j.yexcr.2014.01.008>.
- 909 8. Jones MB, Highlander SK, Anderson EL, Li W, Dayrit M, Klitgord N, et al. Library  
910 preparation methodology can influence genomic and functional predictions in

- 911 human microbiome research. *Proceedings of the National Academy of Sciences*.  
912 2015;112 45:14024-9. doi:10.1073/pnas.1519288112.
- 913 9. Ross MG, Russ C, Costello M, Hollinger A, Lennon NJ, Hegarty R, et al.  
914 Characterizing and measuring bias in sequence data. *Genome Biol*. 2013;14  
915 5:R51. doi:10.1186/gb-2013-14-5-r51.
- 916 10. Chen Y-C, Liu T, Yu C-H, Chiang T-Y and Hwang C-C. Effects of GC bias in  
917 next-generation-sequencing data on de novo genome assembly. *PLoS One*.  
918 2013;8 4:e62856. doi:10.1371/journal.pone.0062856.
- 919 11. Benjamini Y and Speed TP. Summarizing and correcting the GC content bias in  
920 high-throughput sequencing. *Nucleic Acids Res*. 2012;40 10:e72.  
921 doi:10.1093/nar/gks001.
- 922 12. Quail MA, Kozarewa I, Smith F, Scally A, Stephens PJ, Durbin R, et al. A large  
923 genome centre's improvements to the Illumina sequencing system. *Nat Methods*.  
924 2008;5 12:1005-10. doi:10.1038/nmeth.1270.
- 925 13. Aird D, Ross MG, Chen W-S, Danielsson M, Fennell T, Russ C, et al. Analyzing  
926 and minimizing PCR amplification bias in Illumina sequencing libraries. *Genome*  
927 *Biol*. 2011;12 2:R18-R. doi:10.1186/gb-2011-12-2-r18.
- 928 14. Chitsaz H, Yee-Greenbaum JL, Tesler G, Lombardo M-J, Dupont CL, Badger JH,  
929 et al. De novo assembly of bacterial genomes from single cells. *Nat Biotechnol*.  
930 2011;29 10:915-21. doi:10.1038/nbt.1966.
- 931 15. Escolà Casas M, Nielsen TK, Kot W, Hansen LH, Johansen A and Bester K.  
932 Degradation of mecoprop in polluted landfill leachate and waste water in a  
933 moving bed biofilm reactor. *Water Research*. 2017;121:213-20.  
934 doi:<https://doi.org/10.1016/j.watres.2017.05.031>.
- 935 16. Roggenbuck M, Bærholm Schnell I, Blom N, Bælum J, Bertelsen MF, Sicheritz-  
936 Pontén T, et al. The microbiome of New World vultures. *Nature Communications*.  
937 2014;5:5498. doi:10.1038/ncomms6498
- 938 <http://www.nature.com/articles/ncomms6498#supplementary-information>.
- 939 17. DeSantis TZ, Hugenholtz P, Larsen N, Rojas M, Brodie EL, Keller K, et al.  
940 Greengenes, a chimera-checked 16S rRNA gene database and workbench  
941 compatible with ARB. *Appl Environ Microb*. 2006;72 7:5069-72.  
942 doi:10.1128/aem.03006-05.
- 943 18. Edgar RC. UNBIAS: An attempt to correct abundance bias in 16S sequencing,  
944 with limited success. *bioRxiv*. 2017; doi:10.1101/124149.
- 945 19. Deamer D, Akeson M and Branton D. Three decades of nanopore sequencing.  
946 *Nat Biotechnol*. 2016;34:518. doi:10.1038/nbt.3423.
- 947 20. Head SR, Komori HK, LaMere SA, Whisenant T, Van Nieuwerburgh F, Salomon  
948 DR, et al. Library construction for next-generation sequencing: overviews and  
949 challenges. *Biotechniques*. 2014;56 2:61-passim. doi:10.2144/000114133.
- 950 21. Bowers RM, Clum A, Tice H, Lim J, Singh K, Ciobanu D, et al. Impact of library  
951 preparation protocols and template quantity on the metagenomic reconstruction  
952 of a mock microbial community. *BMC Genomics*. 2015;16 1:856.  
953 doi:10.1186/s12864-015-2063-6.
- 954 22. Meyer M and Kircher M. Illumina sequencing library preparation for highly  
955 multiplexed target capture and sequencing. *Cold Spring Harbor Protocols*.  
956 2010;2010 6:pdb.prot5448. doi:10.1101/pdb.prot5448.

- 957 23. Nielsen TK, Rasmussen M, Demanèche S, Cecillon S, Vogel TM and Hansen  
958 LH. Evolution of sphingomonad gene clusters related to pesticide catabolism  
959 revealed by genome sequence and mobilomics of *Sphingobium herbicidovorans*  
960 MH. *Genome Biol Evol.* 2017;9 9:2477-90. doi:10.1093/gbe/evx185.
- 961 24. Martin M. Cutadapt removes adapter sequences from high-throughput  
962 sequencing reads. *EMBnetjournal.* 2011;17 1:10-2. doi:10.14806/ej.17.1.200.
- 963 25. Chaisson MJ and Tesler G. Mapping single molecule sequencing reads using  
964 basic local alignment with successive refinement (BLASR): application and  
965 theory. *BMC Bioinformatics.* 2012;13 1:238. doi:10.1186/1471-2105-13-238.
- 966 26. Lindgreen S. AdapterRemoval: easy cleaning of next-generation sequencing  
967 reads. *BMC Research Notes.* 2012;5 1:337. doi:10.1186/1756-0500-5-337.
- 968 27. Bankevich A, Nurk S, Antipov D, Gurevich AA, Dvorkin M, Kulikov AS, et al.  
969 SPAdes: A new genome assembly algorithm and its applications to single-cell  
970 sequencing. *Journal of Computational Biology.* 2012;19 5:455-77.  
971 doi:10.1089/cmb.2012.0021.
- 972 28. Aziz RK, Bartels D, Best AA, DeJongh M, Disz T, Edwards RA, et al. The RAST  
973 server: Rapid annotations using subsystems technology. *BMC Genomics.*  
974 2008;9:75-. doi:10.1186/1471-2164-9-75.
- 975 29. Alikhan N-F, Petty NK, Ben Zakour NL and Beatson SA. BLAST Ring Image  
976 Generator (BRIG): simple prokaryote genome comparisons. *BMC Genomics.*  
977 2011;12 1:1-10. doi:10.1186/1471-2164-12-402.
- 978 30. Li H. Aligning sequence reads, clone sequences and assembly contigs with  
979 BWA-MEM. 2013.
- 980 31. Li H. Minimap2: pairwise alignment for nucleotide sequences. *ArXiv e-prints.*  
981 2017.
- 982 32. Li H, Handsaker B, Wysoker A, Fennell T, Ruan J and Homer N. The sequence  
983 alignment/map format and SAMtools. *Bioinformatics.* 2009;25  
984 doi:10.1093/bioinformatics/btp352.
- 985 33. Iglewicz B and Hoaglin DC. How to detect and handle outliers. ASQC Quality  
986 Press; 1993.
- 987 34. Zepeda Mendoza ML, Roggenbuck M, Manzano Vargas K, Hansen LH, Brunak  
988 S, Gilbert MTP, et al. Protective role of the vulture facial skin and gut  
989 microbiomes aid adaptation to scavenging. *Acta Veterinaria Scandinavica.*  
990 2018;60 1:61. doi:10.1186/s13028-018-0415-3.
- 991 35. Krueger F: Trim Galore!  
992 [http://www.bioinformatics.babraham.ac.uk/projects/trim\\_galore/](http://www.bioinformatics.babraham.ac.uk/projects/trim_galore/).
- 993 36. Peng Y, Leung HCM, Yiu SM and Chin FYL. IDBA-UD: a de novo assembler for  
994 single-cell and metagenomic sequencing data with highly uneven depth.  
995 *Bioinformatics.* 2012;28 11:1420-8. doi:10.1093/bioinformatics/bts174.
- 996 37. Li D, Luo R, Liu C-M, Leung C-M, Ting H-F, Sadakane K, et al. MEGAHIT v1.0: A  
997 fast and scalable metagenome assembler driven by advanced methodologies  
998 and community practices. *Methods.* 2016;102:3-11.  
999 doi:https://doi.org/10.1016/j.ymeth.2016.02.020.
- 1000 38. Browne P, Tamaki H, Kyrpides N, Woyke T, Goodwin L, Imachi H, et al. Genomic  
1001 composition and dynamics among *Methanomicrobiales* predict adaptation to  
1002 contrasting environments. *ISME J.* 2017;11 1:87-99. doi:10.1038/ismej.2016.104.

- 1003 39. Bäckhed F, Roswall J, Peng Y, Feng Q, Jia H, Kovatcheva-Datchary P, et al.  
 1004 Dynamics and stabilization of the human gut microbiome during the first year of  
 1005 life. *Cell Host & Microbe*. 2015;17 5:690-703.  
 1006 doi:<https://doi.org/10.1016/j.chom.2015.04.004>.  
 1007 40. Vollmers J, Frentrup M, Rast P, Jogler C and Kaster A-K. Untangling genomes of  
 1008 novel planctomycetal and verrucomicrobial species from Monterey Bay kelp  
 1009 forest metagenomes by refined binning. *Front Microbiol*. 2017;8:472.  
 1010 doi:10.3389/fmicb.2017.00472.

1011

1012

1013

## 1014 **Figures and tables**

### 1015 **Tables**

1016 Table 1: Sources of datasets for GC-bias analysis in metagenome sequencing

| Accession no. /<br>Name (Relevant<br>supplementary<br>data) | Sequencing<br>technology | Library<br>preparation<br>kit                                 | Environment                   | Reference                          | Total<br>Contigs<br>> 10 kb | Assembly<br>length ><br>10 kb | N <sub>50</sub> ><br>10 kb | Num.<br>PCR<br>cycles |
|-------------------------------------------------------------|--------------------------|---------------------------------------------------------------|-------------------------------|------------------------------------|-----------------------------|-------------------------------|----------------------------|-----------------------|
| ERR526087<br>(Additional file 8)                            | HiSeq 2000               | Paired-End<br>Genomic<br>DNA Sample<br>Prep Kit<br>(Illumina) | Human faeces<br>(female)      | [39]                               | 2880                        | 71.9 Mb                       | 29679                      | 10 –<br>12            |
| SRR5035895<br>(Additional file 9)                           | MiSeq                    | NEBnext<br>Ultra                                              | Kelp<br>associated<br>biofilm | [40]                               | 217                         | 3.77 Mb                       | 18496                      | 4 – 12                |
| SRS049959<br>(Additional file<br>10)                        | GA II                    | Paired-End<br>Genomic<br>DNA Sample                           | Human faeces<br>(male)        | NIH Human<br>Microbiome<br>Project | 1409                        | 21.6 Mb                       | 14775                      | 10 –<br>12            |

|                                       |            | Prep Kit<br>(Illumina) |                                                                  |      |      |         |       |    |
|---------------------------------------|------------|------------------------|------------------------------------------------------------------|------|------|---------|-------|----|
| SRR8570466<br>(Additional file<br>11) | NextSeq    | Nextera                | Moving bed<br>biofilm<br>reactors with<br>effluent<br>wastewater | [15] | 5496 | 109 Mb  | 20186 | 8  |
| SRR7521238<br>(Additional file<br>12) | HiSeq 2500 | NEBNext                | Intestinal<br>contents of a<br>turkey vulture                    | [34] | 1256 | 26.9 Mb | 22974 | 14 |

1017 Assembly statistics are presented for contigs larger than 10 kb only. The number of PCR cycles used  
1018 during library preparation was inferred from the library preparation kit's instructions when it couldn't be  
1019 found in the referenced publications.

1020

1021 Table 2: Primer pairs used for ddPCR

| Product                        | Forward primer        | Reverse primer       | Product size |
|--------------------------------|-----------------------|----------------------|--------------|
| ATP synthase<br>β-subunit      | TGCTAAGGGACATGGAGGAC  | AAGTCATCGGCTGGTACGTA | 414 bp       |
| SSU<br>ribosomal<br>protein S3 | CGGAAGAAAAGGTGCTGAAAT | CTACGCTTCTCCTCCTCCC  | 424 bp       |
| SSU<br>ribosomal<br>RNA        | GCAGCAGTGGGGAATATTGG  | CTGTTTGCTACCCACGCTTT | 413 bp       |

1022

1023

1024 Table 3: Primers used to amplify 5.3 kb regions with different GC contents from *Fusobacterium* C1's  
1025 genome

| Primer name | Primer Sequence          | Orientation | Region                       |
|-------------|--------------------------|-------------|------------------------------|
| NormA_F     | TACTAGCTCCACTTTTAATACCTG | fwd         | 1350019..1350042             |
| NormA_R     | GCTCTTCTTATTTACCTTCATCT  | rev         | complement(1355348..1355371) |
| RNA_F       | CTGTCTTTGCAAACCTTTCTATT  | fwd         | 1317778..1317800             |
| RNA_R       | ATTGGCTTCTTGTGTTTTAGTT   | rev         | complement(1323108..1323130) |

1026

1027

## 1028 **Figures**

1029 **Figure 1:** Coverage biases in the sequencing of *Fusobacterium* sp. C1. The circle plot  
1030 shows from the inside: GC content (Ring 1), positions of CDSs, rRNAs, and tRNAs  
1031 (Ring 2), positions of the PCR targets for ddPCR and the 5.3 kb PCR products (Ring 3),  
1032 and coverages of Nanopore reads, MiSeq reads, NextSeq reads, HiSeq reads and  
1033 PacBio reads (Rings 4 – 8 respectively). The circles are numbered from the inside. The  
1034 GC content plot is centred on the median GC content, with GC contents greater than  
1035 the median extending outwards. The coverage data is plotted in 50 nt windows, with  
1036 separate linear scales for each dataset.

1037

1038 **Figure 2:** Coverage biases in MiSeq datasets from many bacteria with different GC  
1039 contents. Dot plots show local GC content and normalised relative coverages in 500 nt  
1040 windows (see methods for explanation) of MiSeq data from a variety of bacteria with



1041 different average GC contents. Error bars indicate  $\pm$  one standard deviation of  
1042 normalised coverage. The intensity of the blue in the dots is a log-transformed heatmap  
1043 of the number of 500 nt windows averaged into that datapoint. The datapoint with the  
1044 most windows in each plot has maximum blue. The vertical green line marks the  
1045 average GC content of each assembly. The average normalised coverage value is  
1046 indicated with a horizontal dashed red line.

1047

1048 **Figure 3:** GC-biases in NextSeq, PacBio, Nanopore and HiSeq data. The dot plots are  
1049 as described in Figure 2.

1050

1051

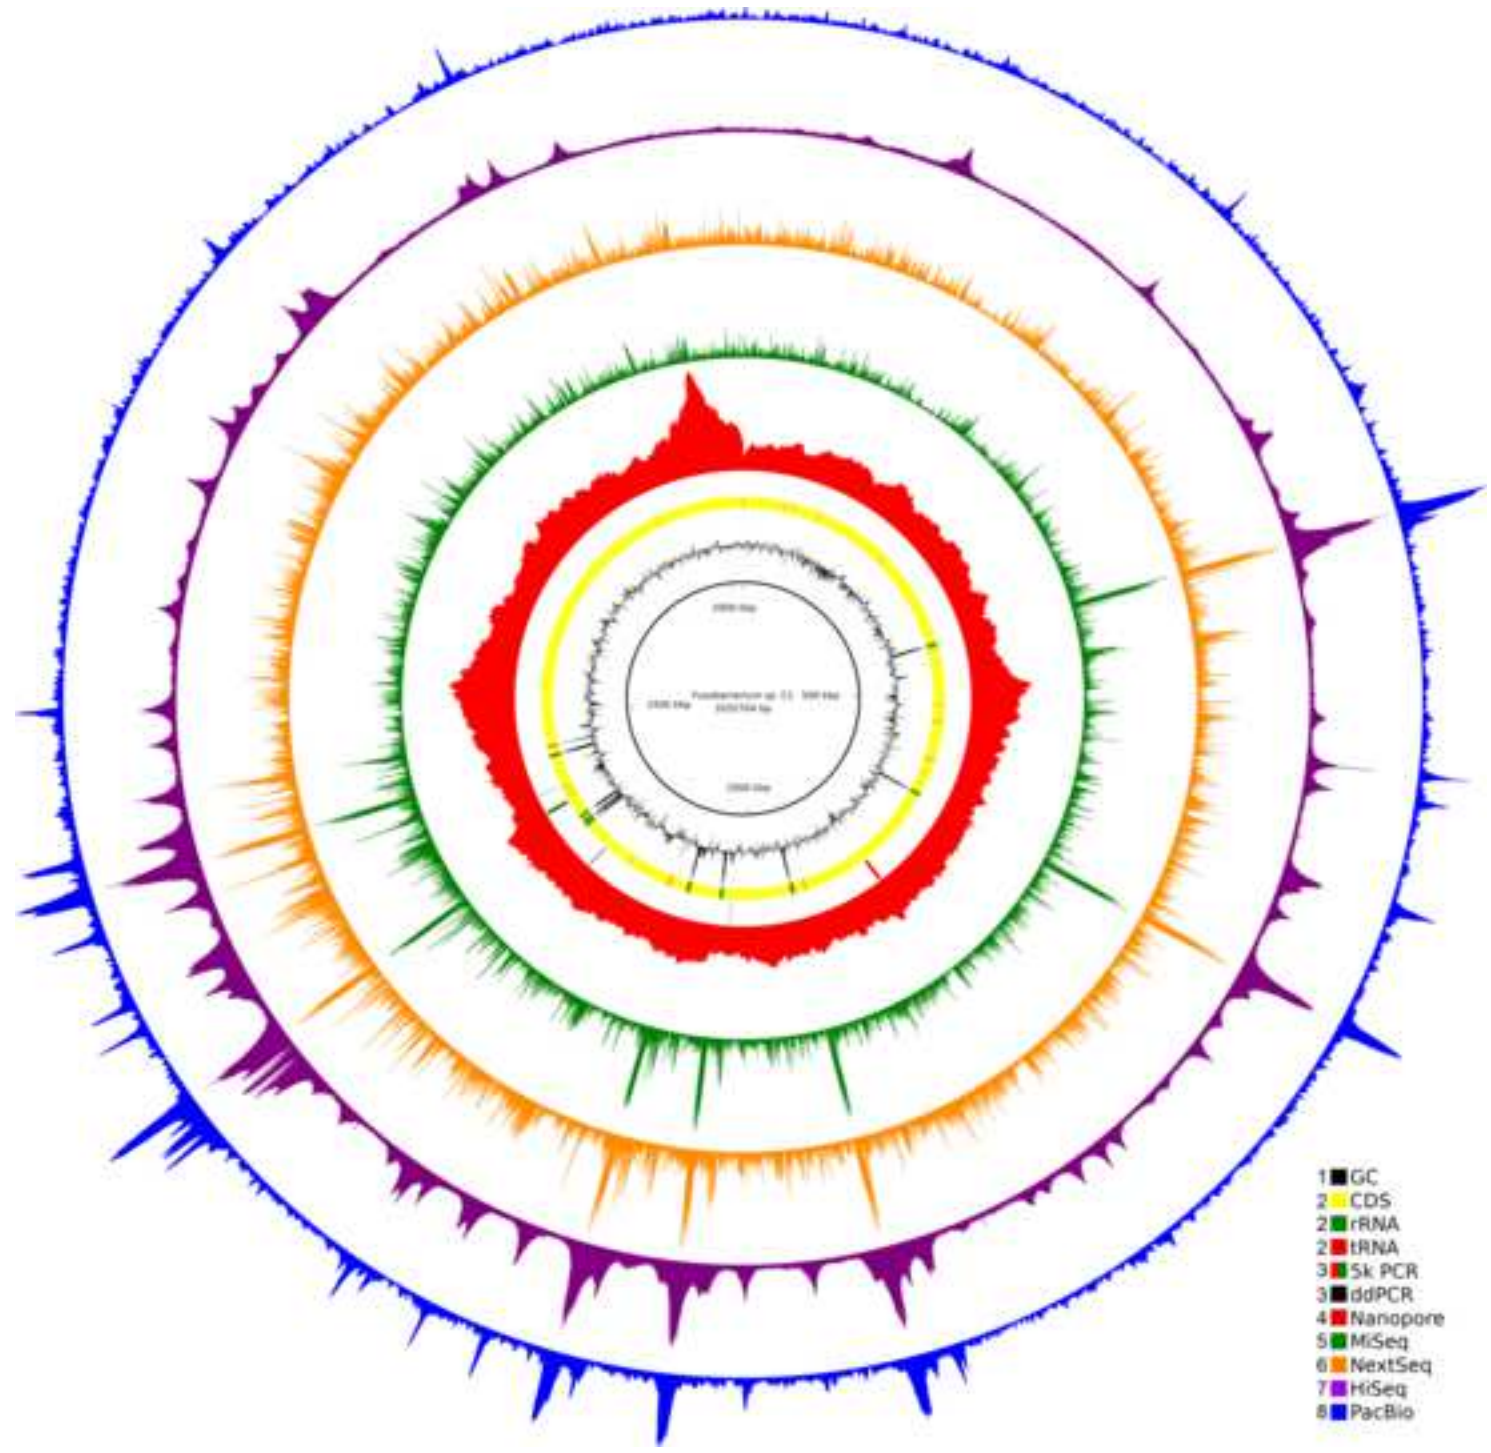

Figure 2

[Click here to access/download;Figure;Fig2\\_MiSeq.tif](#)

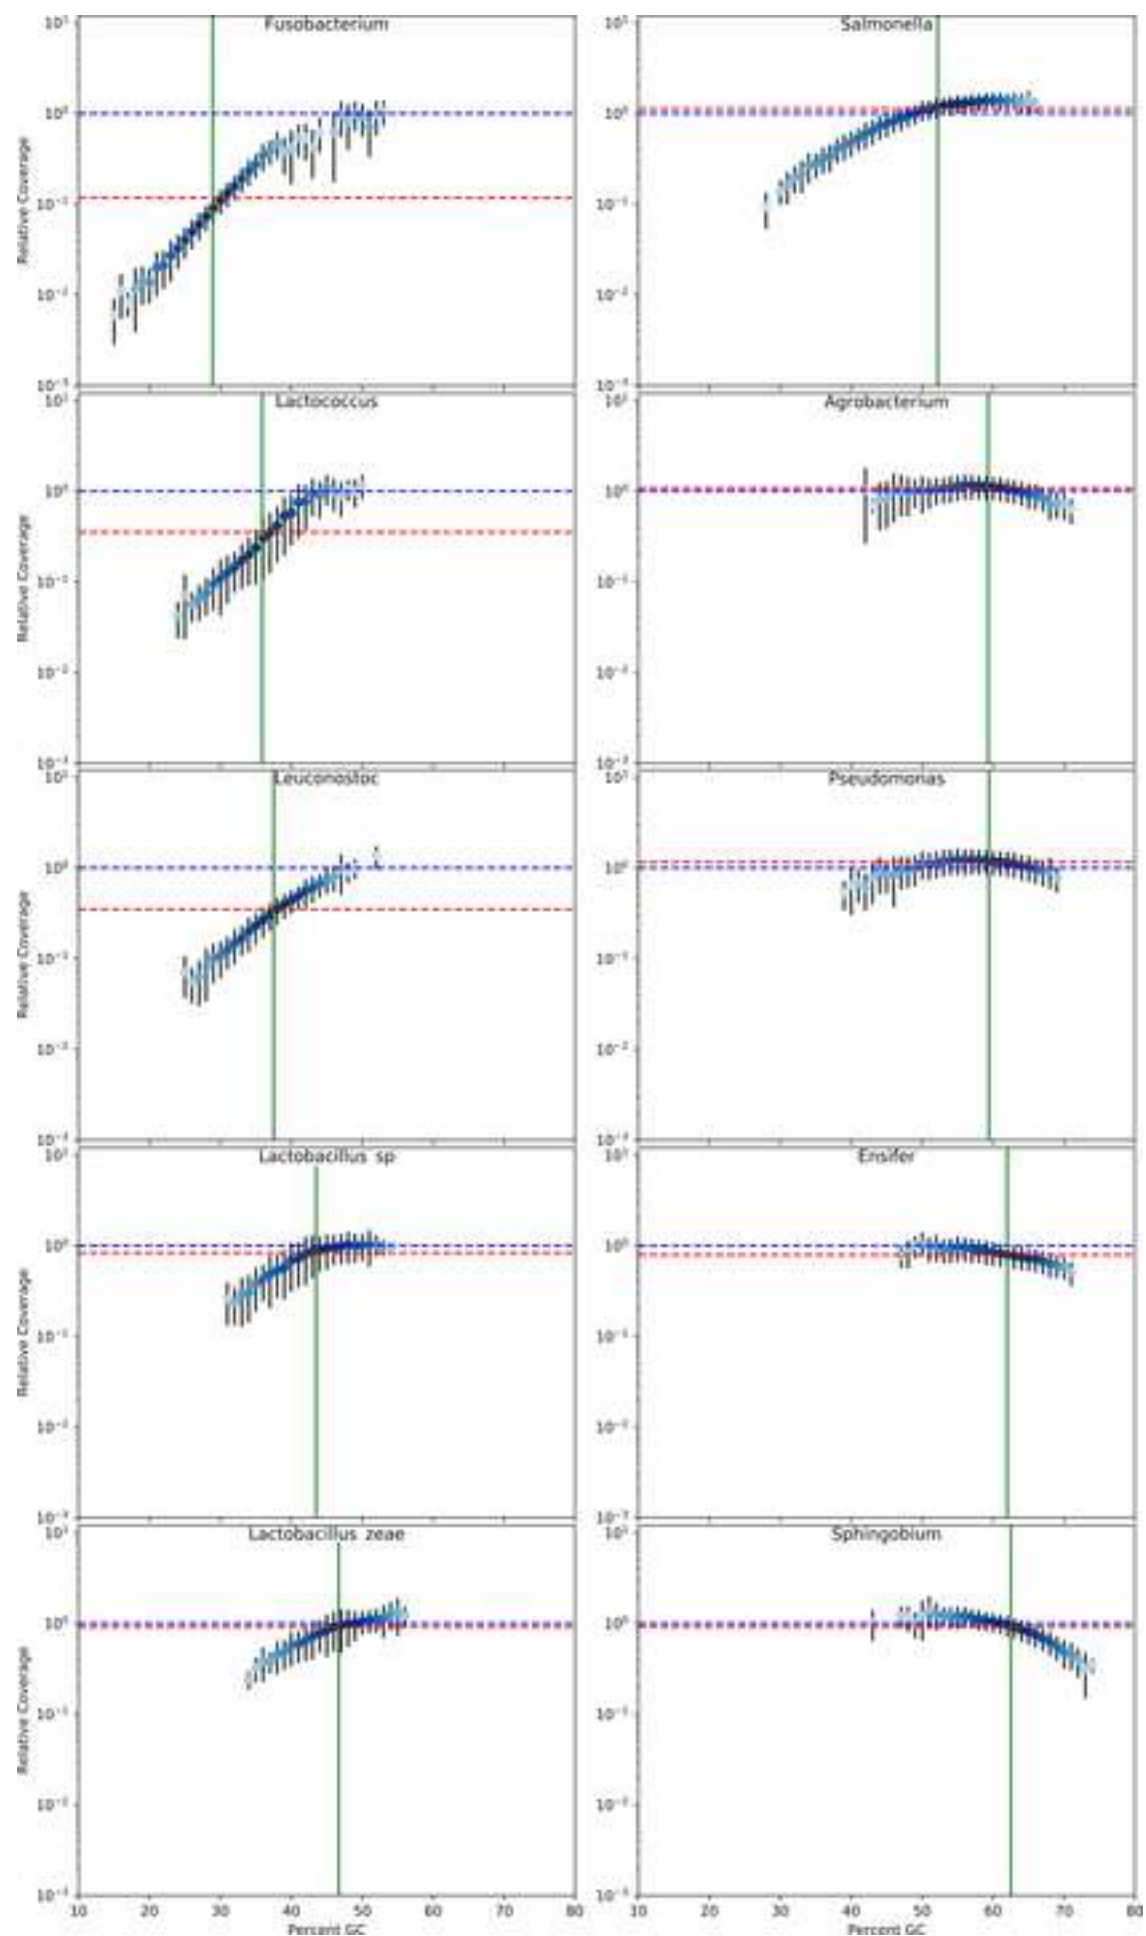

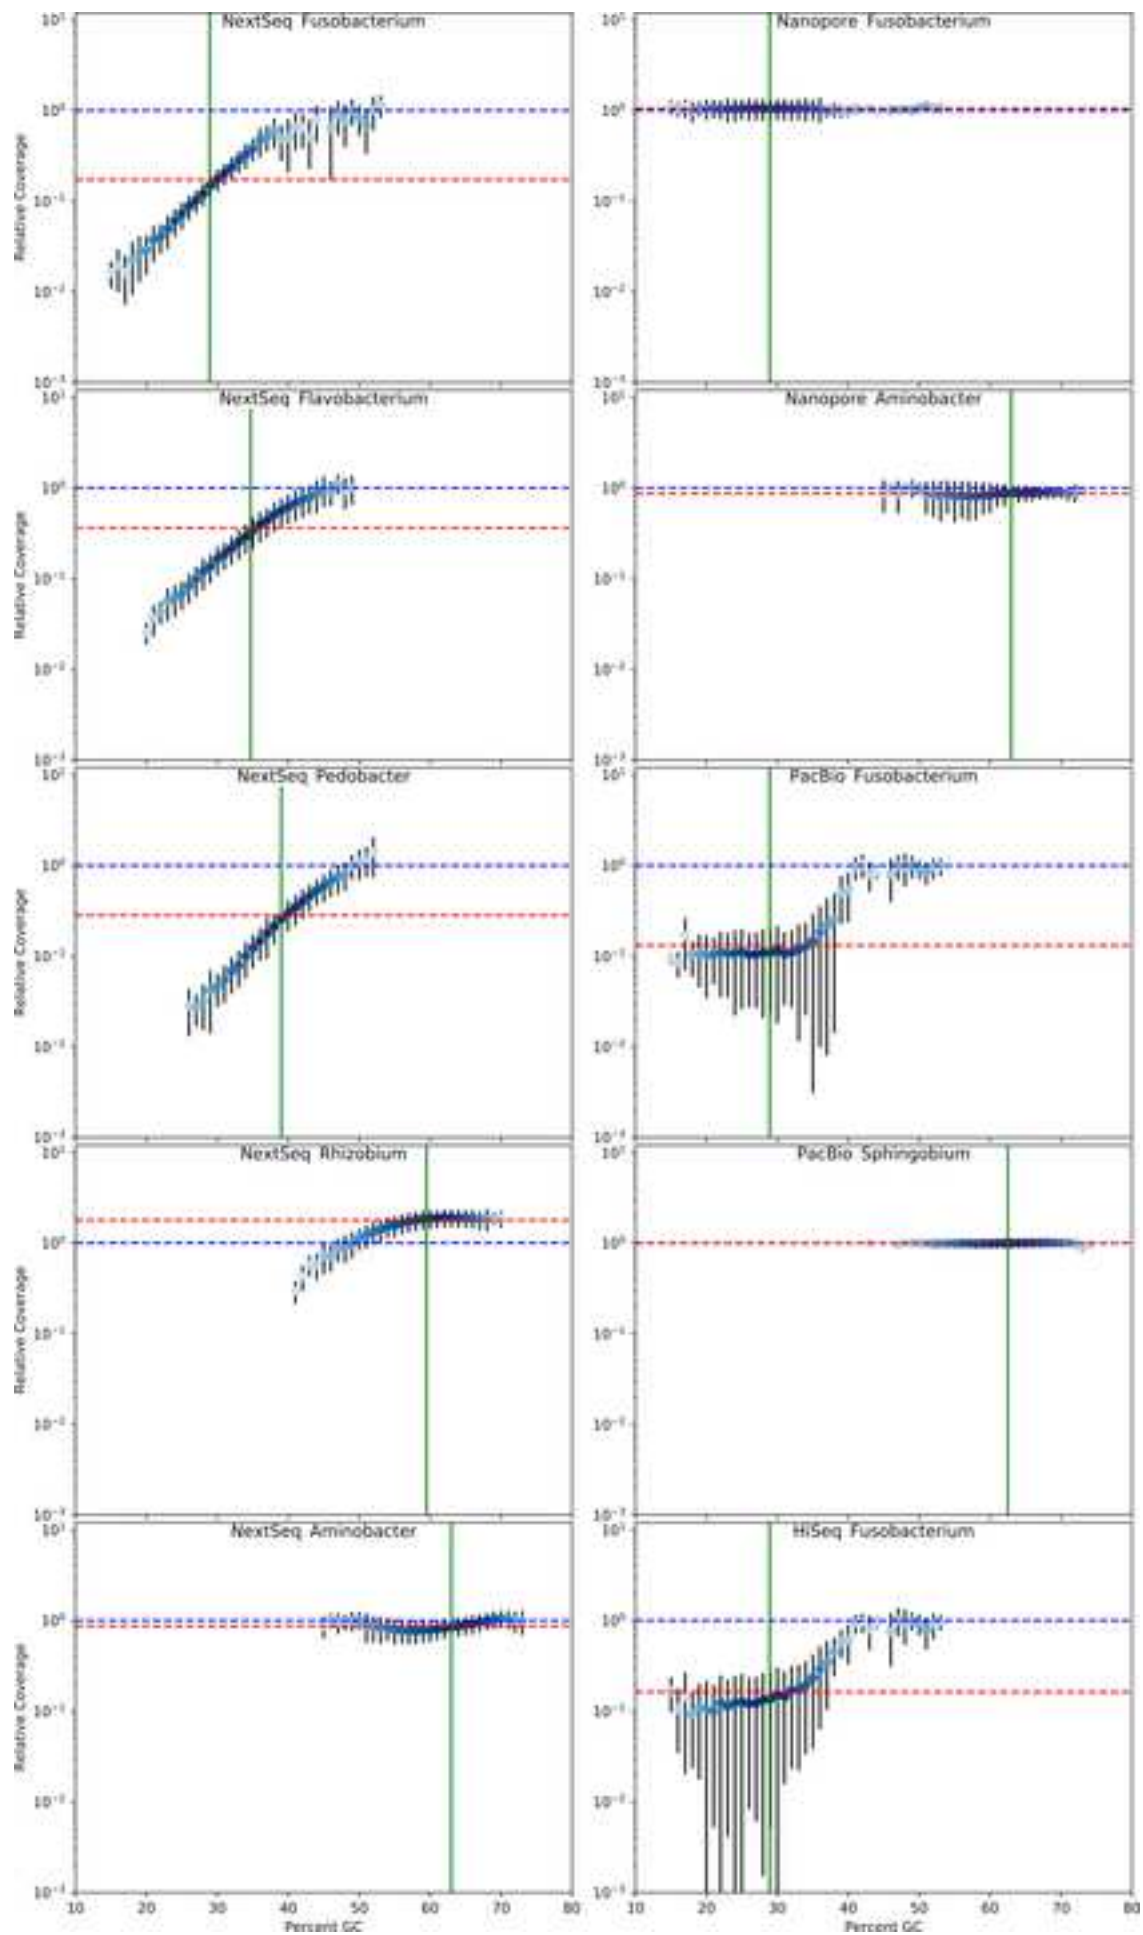

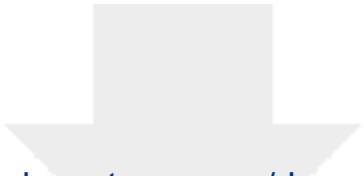

Click here to access/download  
**Supplementary Material**  
Additional file 1.docx



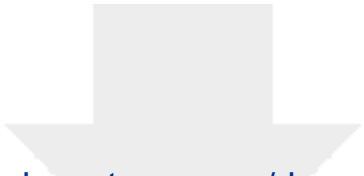

Click here to access/download  
**Supplementary Material**  
Additional file 2.docx



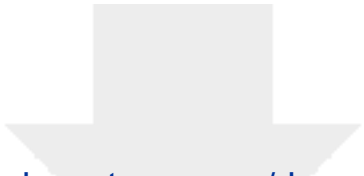

Click here to access/download  
**Supplementary Material**  
Additional file 3.docx



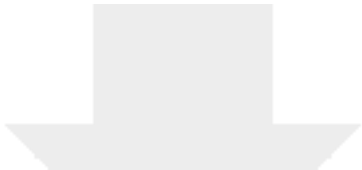

Click here to access/download  
**Supplementary Material**  
Additional file 4.docx





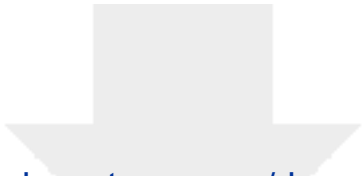

Click here to access/download  
**Supplementary Material**  
Additional file 5.docx



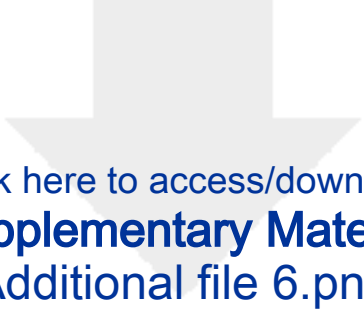

Click here to access/download  
**Supplementary Material**  
Additional file 6.png

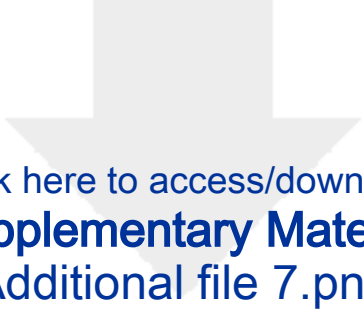

Click here to access/download  
**Supplementary Material**  
Additional file 7.png



Click here to access/download  
**Supplementary Material**  
Additional file 8.mp4



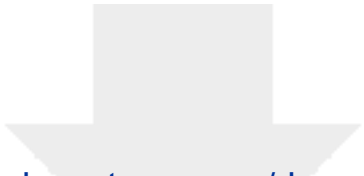

Click here to access/download  
**Supplementary Material**  
Additional file 9.mp4





Click here to access/download  
**Supplementary Material**  
Additional file 10.mp4



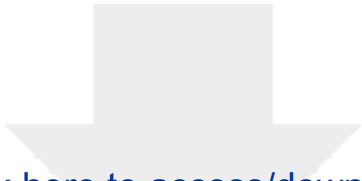

Click here to access/download  
**Supplementary Material**  
Additional file 11.mp4





Click here to access/download  
**Supplementary Material**  
Additional file 12.mp4





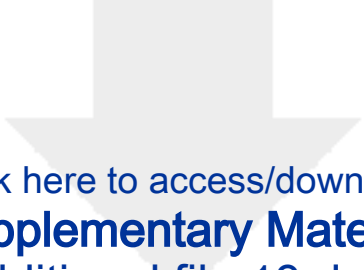

Click here to access/download  
**Supplementary Material**  
Additional file 13.docx



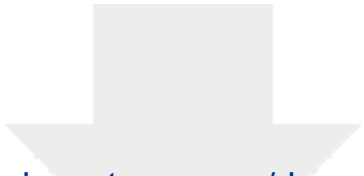

Click here to access/download  
**Supplementary Material**  
Additional file 14.png





Click here to access/download  
**Supplementary Material**  
Additional file 15.docx



Supplement: giaa008_giga-d-19-00255_revision_1.pdf [file giaa008_giga-d-19-00255_revision_1.pdf]
